# Supplementary material for: Reviews and syntheses: Best practices for the application of marine GDGTs as proxy for paleotemperatures: sampling, processing, analyses, interpretation, and archiving protocols
Source: Copernicus journal article supplement (doi:10.5194/bg-22-6465-2025), 2025-11-06
Supplement: Supplementary file 1 [file Table S1.xlsx]

## Sheet: Appendix 1
Sample	Extraction method	Temperature setting (ºC)	extracted dry weight (g)	TLE dry weight (ug)	TLE yield (ug/g)	raw_1302	raw_1300	raw_1298	raw_1296	raw_1292	raw_1292_prime	raw_1050	raw_1050_prime	raw_1036	raw_1036_prime	raw_1034	raw_1034_prime	raw_1022	raw_1020	raw_1018	raw_744	TEX86	BIT
pp197-ASE	ASE	100	7.8	5	0.64	166000	35900	47100	23700	180000	10500	18800	6220	140000	31900	6810	4300	1770000	92400	33800	1450000	0.6938	0.9159
PP197-M70A	microwave	70	6.4	4.6	0.72	102000	22400	28000	15200	112000	6900	12300	4330	91800	20200	4680	3090	1190000	58400	23600	1530000	0.6908	0.9213
PP197-M70B	microwave	70	5.57	4.5	0.81	87900	19000	24800	13200	98700	5610	9970	4560	80500	18000	3780	2290	1010000	53000	20500	1400000	0.6964	0.919
PP197-M110A	microwave	110	5.78	5.5	0.95	103000	20300	35700	16800	98600	5650	10700	4440	75600	18100	4600	2780	951000	50200	18900	1430000	0.7414	0.9149
PP197-M110B	microwave	110	5.69	3.7	0.65	106000	22400	38300	17700	107000	6300	10600	3960	77600	17800	3900	2600	965000	50700	18000	1430000	0.735	0.9091
PP197-CEM	microwave	100	5.03	3.3	0.66	96900	20100	27500	13600	101000	5950	9260	4220	76200	17100	4680	4010	972000	49800	19400	1470000	0.7011	0.9146
PP223-ASE	ASE	100	7.8	2.7	0.35	165000	49000	52800	50400	127000	6430	14300	5080	117000	32800	7380	4870	1310000	71800	26800	1570000	0.6913	0.9212
PP223-M70A	microwave	70	5.91	3.6	0.61	102000	30900	32700	30900	72300	3790	9310	3210	71100	19500	4180	3130	775000	42700	16400	1490000	0.6852	0.9239
PP223-M70B	microwave	70	5.85	3.9	0.67	82400	24900	27100	26600	61200	3030	7450	2070	55700	16000	2570	1630	650000	37000	13900	1430000	0.6948	0.9228
PP223-M110A	microwave	110	6.18	3.8	0.61	88900	27500	31400	33000	65200	3650	8250	2430	49800	13000	2650	1890	526000	28500	11000	1380000	0.7119	0.902
PP223-M110B	microwave	110	5.84	3.5	0.6	91900	27000	33000	34300	66400	3710	7960	2020	59400	15900	3140	1470	655000	34600	12500	1410000	0.7246	0.9177
PP223-CEM	microwave	100	5.01	2.5	0.5	80200	23000	24500	23100	62500	3000	7830	1900	56700	15600	2830	1940	623000	36600	13400	1420000	0.687	0.9186
