# Supplementary material for: Reviews and syntheses: Best practices for the application of marine GDGTs as proxy for paleotemperatures: sampling, processing, analyses, interpretation, and archiving protocols
Source: Copernicus journal article supplement (doi:10.5194/bg-22-6465-2025), 2025-11-06
Supplement: Supplementary file 3 [file Table S2.xlsx]

## Sheet: Appendix 2
LC STANDARD RUNS Arabian Sea: Rowden Soil 1:4
Row	Date	Name	LC file	raw_1302	raw_1300	raw_1298	raw_1296	raw_1292	raw_1292_prime	raw_1050	raw_1050_prime	raw_1048	raw_1048_prime	raw_1046	raw_1046_prime	raw_1036	raw_1036_prime	raw_1034	raw_1034_prime	raw_1032	raw_1032_prime	raw_1022	raw_1020	raw_1018	raw_744	TEX86	SST (TEX86)	TEX86H	TEX86L	MATmr	BIT	Cren/C46	1050/C46	Fragmentor		total	f1302	f1300	f1298	f1296	f1292	f1292_prime	f1050	f1050_prime	f1036	f1036_prime	f1034	f1034_prime	f1032
368	2022-08-18	Other	22080221	2240746	749869	825728	229173	12096120	930862	413447	130201	NQ	NQ	NQ	NQ	1700586	225605	105485	57893	35425	10381	2003406	234218	75359		0.725888	30.0149	-0.13913	0.0415056	6.02418	0.269971					22064504	0.101554	0.0339853	0.0374234	0.0103865	0.548216	0.0421882	0.0187381	0.00590093	0.0770734	0.0102248	0.00478076	0.00262381	0.00160552
370	2022-08-19	Other	22080260	1871202	635402	736964	194445	10118607	800818	346886	102940	NQ	NQ	NQ	NQ	1436629	210889	96519	52186	32332	8503	1751658	199832	69332		0.731629	30.3376	-0.135709	0.0435882	6.34042	0.275566					18665144	0.100251	0.0340422	0.0394834	0.0104175	0.542112	0.0429045	0.0185847	0.00551509	0.0769685	0.0112985	0.00517108	0.00279591	0.00173221
149	2019-03-13	Technician 1	19030036	348386	119458	138583	39343	1846610	173316	70564	20115	NQ	NQ	NQ	NQ	312111	44524	21133	9567	5926	2218	359878	40161	14135		0.746212	31.1571	-0.127138	0.0722888	5.78601	0.304164					3566028	0.0976958	0.0334989	0.038862	0.0110327	0.517834	0.048602	0.0197878	0.00564073	0.0875234	0.0124856	0.0059262	0.00268282	0.00166179
152	2019-03-15	Technician 1	19030043	568700	186582	211595	55135	2928910	225131	92707	29854	NQ	NQ	NQ	NQ	425988	55296	23423	10256	7416	2271	477725	45229	13315		0.724985	29.9642	-0.139671	0.0354452	5.15502	0.269686					5359533	0.10611	0.0348131	0.0394801	0.0102873	0.546486	0.0420057	0.0172976	0.00557026	0.0794823	0.0103173	0.00437034	0.0019136	0.0013837
153	2019-03-19	Technician 1	19030051	357645	120575	144520	38577	1822573	158712	67022	20027	NQ	NQ	NQ	NQ	282506	35344	19307	9401	6065	1626	327015	36049	12707		0.739232	30.7648	-0.131219	0.0513787	5.80301	0.286521					3459671	0.103375	0.0348516	0.0417728	0.0111505	0.526805	0.0458749	0.0193724	0.0057887	0.0816569	0.010216	0.00558059	0.00271731	0.00175306
154	2019-03-19	Technician 1	19030052	366693	124215	143757	40338	1819111	160291	67979	21191	NQ	NQ	NQ	NQ	280693	42555	19926	8991	4979	1522	325351	36351	13284		0.734924	30.5227	-0.133758	0.0480579	5.87463	0.288543					3477227	0.105456	0.0357224	0.0413424	0.0116006	0.52315	0.0460974	0.0195498	0.00609422	0.0807232	0.0122382	0.00573043	0.00258568	0.00143189
155	2019-03-19	Technician 1	19030053	376469	124950	146619	40978	1886010	167351	67729	19688	NQ	NQ	NQ	NQ	284585	44303	17349	11839	5614		331307	36366	13710		0.739632	30.7873	-0.130984	0.0552494	5.89638	0.283872					3574867	0.10531	0.0349523	0.0410138	0.0114628	0.527575	0.0468132	0.0189459	0.00550734	0.0796072	0.0123929	0.00485305	0.00331173	0.00157041
159	2019-04-10	Technician 1	19040029	320820	108163	120849	34133	1564520	132919	58305	17444	NQ	NQ	NQ	NQ	253195	33129	17046	7569	5237	1000	290786	34559	11417		0.726905	30.0721	-0.138522	0.0390481	5.82543	0.294428					3011091	0.106546	0.0359215	0.0401346	0.0113358	0.519586	0.0441431	0.0193634	0.00579325	0.0840875	0.0110023	0.00566107	0.00251371	0.00173924
163	2019-05-16	Technician 1	19050042	285486	98987	109707	32423	1386649	124670	55803	16422	NQ	NQ	NQ	NQ	220915	33255	15487	6095	4267		261610	27913	9567		0.729386	30.2115	-0.137042	0.043958	5.95313	0.297776					2689256	0.106158	0.0368083	0.0407946	0.0120565	0.515626	0.0463585	0.0207503	0.00610652	0.0821473	0.0123659	0.00575884	0.00226643	0.00158668
164	2019-06-13	Technician 1	19060061	1791900	616451	731656	196514	9262790	778154	352982	124033	NQ	NQ	NQ	NQ	1342170	197463	100109	41039	27351	6968	1531500	189544	64144		0.734606	30.5048	-0.133946	0.0432396	5.89233	0.276962					17354768	0.103251	0.0355206	0.0421588	0.0113233	0.533732	0.0448381	0.0203392	0.00714691	0.0773372	0.011378	0.00576839	0.00236471	0.00157599
165	2019-06-19	Technician 1	19060086	1901810	626677	761194	205839	9894310	822692	355331	124750	NQ	NQ	NQ	NQ	1416420	214291	101584	49683	29720	8371	1631990	197354	66507		0.740657	30.8449	-0.130383	0.050377	5.92994	0.274456					18408523	0.103311	0.0340428	0.0413501	0.0111817	0.537485	0.0446908	0.0193025	0.00677675	0.0769437	0.0116409	0.00551831	0.00269891	0.00161447
166	2019-06-19	Technician 1	19060085	1908310	646915	749039	215882	9972870	827978	358466	124650	NQ	NQ	NQ	NQ	1449450	198213	106878	41476	31862	7490	1663760	203018	66946		0.734851	30.5186	-0.133801	0.046235	5.88999	0.275618					18573203	0.102745	0.0348306	0.040329	0.0116233	0.536949	0.0445792	0.0193002	0.00671128	0.0780399	0.010672	0.00575442	0.00223311	0.00171548
167	2019-06-27	Technician 1	19060120	1915940	634029	740531	203995	9715646	831625	357316	119581	NQ	NQ	NQ	NQ	1439480	199369	106241	47622	29641	7138	1680820	199337	69186		0.736937	30.6359	-0.13257	0.0512202	6.02231	0.280973					18297497	0.10471	0.0346511	0.0404717	0.0111488	0.530982	0.0454502	0.0195281	0.00653537	0.0786709	0.010896	0.00580631	0.00260265	0.00161995
172	2019-07-22	Technician 1	19070060	1411531	482869	586418	158557	7383425	624054	278288	95884	NQ	NQ	NQ	NQ	1098662	153107	77109	39852	23328	6400	1260331	151527	51206		0.739257	30.7663	-0.131204	0.0472695	5.87691	0.281047					13882548	0.101677	0.0347824	0.0422414	0.0114213	0.531849	0.0449524	0.0200459	0.0069068	0.0791398	0.0110287	0.00555438	0.00287065	0.00168038
173	2019-07-23	Technician 1	19070061	1433570	475069	566017	154839	7207750	623659	272349	86929.5	NQ	NQ	NQ	NQ	1103750	140359	82875.5	34151.8	24112.8	6896.04	1258670	153308	49621		0.738913	30.7469	-0.131406	0.0508617	5.81104	0.284222					1.36739e+07	0.10484	0.0347427	0.0413939	0.0113237	0.527116	0.0456094	0.0199174	0.00635732	0.0807193	0.0102647	0.00606084	0.00249759	0.00176341
176	2019-09-16	Technician 1	19090012	1546070	522078	641637	173321	8120020	702436	292323	91965	NQ	NQ	NQ	NQ	1194230	139984	84122.9	40440.6	24983.3	7285.77	1368070	162046	56296		0.744013	31.0335	-0.128419	0.0549553	5.83327	0.275425					1.51673e+07	0.101934	0.0344213	0.0423039	0.0114273	0.535363	0.0463125	0.0192732	0.00606337	0.0787371	0.00922932	0.00554633	0.0026663	0.00164718
177	2019-09-24	Technician 1	19090035	1499000	496212	603605	164486	7666500	656555	285888	92823	NQ	NQ	NQ	NQ	1131330	142825	78029	36065	23029	7317	1268040	152750	50600		0.741672	30.9019	-0.129788	0.0518558	5.64778	0.275885					14355054	0.104423	0.0345671	0.0420483	0.0114584	0.534063	0.0457369	0.0199155	0.00646622	0.0788106	0.00994946	0.00543565	0.00251236	0.00160424
178	2019-09-26	Technician 1	19090040	1038040	354692	419793	115883	5293220	448418	205106	68071	NQ	NQ	NQ	NQ	791447	106243	55365	28557	15840		900962	106873	37065		0.735064	30.5306	-0.133675	0.043467	5.79412	0.281306					9985575	0.103954	0.0355204	0.0420399	0.011605	0.530087	0.0449066	0.0205402	0.00681693	0.079259	0.0106396	0.0055445	0.00285983	0.00158629
181	2019-10-12	Technician 1	19120006	951232	314363	385097	100103	4868970	394484	180147	54187	NQ	NQ	NQ	NQ	743630	78442	50540	26006	15601	3650	844514	101462	32945		0.736725	30.6239	-0.132695	0.041474	5.73158	0.28079					9145373	0.104012	0.034374	0.0421084	0.0109458	0.532397	0.0431348	0.0196982	0.00592507	0.0813122	0.00857723	0.00552629	0.00284362	0.00170589
179	2019-10-25	Technician 1	19100037	1624750	540392	673636	177054	8358230	712102	316363	95908	NQ	NQ	NQ	NQ	1240260	169006	90489	44125	26101	7150	1448290	171790	57129		0.74306	30.98	-0.128976	0.0505484	5.99969	0.281201					15752775	0.103141	0.0343046	0.042763	0.0112395	0.530588	0.0452049	0.020083	0.00608832	0.0787328	0.0107286	0.00574432	0.00280109	0.00165691
182	2019-12-12	Technician 1	19120021	997908	333171	398903	107378	5190690	424825	196114	64041	NQ	NQ	NQ	NQ	767775	93884	53613	24428	16425	4119	870183	104869	35873		0.736473	30.6098	-0.132843	0.0450033	5.7681	0.277333					9684199	0.103045	0.0344036	0.0411911	0.011088	0.535996	0.0438679	0.0202509	0.00661294	0.0792812	0.00969456	0.00553613	0.00252246	0.00169606
219	2020-08-07	Technician 1	20080002	5135830	1692350	1979690	505099	28323400	2206950	964531	297112	NQ	NQ	NQ	NQ	4254100	507713	272939	136847	79210	22007	5023420	549950	188113		0.734911	30.522	-0.133765	0.0504549	5.94586	0.280589					52139261	0.0985022	0.0324583	0.0379693	0.0096875	0.543226	0.042328	0.0184991	0.00569843	0.0815911	0.00973763	0.00523481	0.00262464	0.0015192
226	2020-12-03	Technician 1	20120009	6690130	2234750	2667790	669195	37988400	3025210	1330580	405381	NQ	NQ	NQ	NQ	5987610	836910	384823	182423	104752	26496	7065910	778325	268270		0.740053	30.811	-0.130737	0.0576165	5.95931	0.291457					70646955	0.0946981	0.0316326	0.0377623	0.00947238	0.537722	0.0428215	0.0188342	0.00573812	0.084754	0.0118464	0.00544713	0.00258218	0.00148275
231	2021-01-11	Technician 1	21010003	7567660	2513840	3055730	776707	42899400	3188190	1488850	452150	NQ	NQ	NQ	NQ	6837060	906455	440106	216289	126029	38386	8045480	889692	290756		0.736342	30.6024	-0.132921	0.0438569	5.90717	0.292432					79732780	0.0949128	0.0315283	0.0383246	0.00974138	0.53804	0.0399859	0.018673	0.00567082	0.0857497	0.0113687	0.00551976	0.00271267	0.00158064
249	2021-04-06	Technician 1	21040002	4558760	1490490	1772250	456326	24928900	1948510	856858	255404	NQ	NQ	NQ	NQ	3813990	541777	240239	130663	71837	22743	4495250	504487	170984		0.737015	30.6402	-0.132524	0.0504395	5.97557	0.285545			90-150		46259468	0.0985476	0.0322202	0.0383111	0.00986449	0.538893	0.0421213	0.0185229	0.00552112	0.0824478	0.0117117	0.00519329	0.00282457	0.00155291
250	2021-04-06	Technician 1	21040004	4466110	1496670	1746640	443545	24481200	1933900	859642	262691	NQ	NQ	NQ	NQ	3791320	489531	249740	116881	71852	20777	4482230	493356	164560		0.733724	30.4553	-0.134467	0.0486716	5.95694	0.287646			90-150		45570645	0.0980041	0.0328429	0.0383282	0.00973313	0.537214	0.0424374	0.0188639	0.00576448	0.0831965	0.0107422	0.00548028	0.00256483	0.00157672
251	2021-04-06	Technician 1	21040006	4442430	1470720	1775850	449098	24343200	1910860	867599	259796	NQ	NQ	NQ	NQ	3804190	510786	258897	118878	70041	22626	4512760	489620	162334		0.737677	30.6775	-0.132134	0.0488674	5.9634	0.290251			90-150		45469685	0.0977009	0.0323451	0.0390557	0.00987687	0.535372	0.0420249	0.0190808	0.00571361	0.0836643	0.0112336	0.00569384	0.00261445	0.00154039
258	2021-04-23	Technician 1	21040142	2525490	809004	975514	251473	13371500	1062340	500998	148399	NQ	NQ	NQ	NQ	2170020	289750	146155	66767	39262	13063	2511030	279890	94606		0.73889	30.7456	-0.13142	0.050932	5.79293	0.295929					25255261	0.0999986	0.0320331	0.0386262	0.00995725	0.529454	0.0420641	0.0198374	0.00587596	0.0859235	0.0114729	0.00578711	0.00264369	0.00155461
259	2021-04-23	Technician 1	21040100	4445970	1493900	1716980	441078	24811600	1920590	858953	270226	NQ	NQ	NQ	NQ	3792660	508712	248227	119934	70428	17471	4433940	494596	166376		0.731918	30.3538	-0.135538	0.0479905	5.88454	0.284475					45811641	0.0970489	0.0326096	0.0374791	0.00962808	0.5416	0.0419236	0.0187497	0.00589863	0.0827881	0.0111044	0.00541843	0.00261798	0.00153734
296	2021-11-18	Technician 1	21110117	1811840	616585	721706	196627	10438700	847802	354797	114922	NQ	NQ	NQ	NQ	1478730	243623	107014	47093	30022	8853	1763320	210515	72939		0.741226	30.8769	-0.130049	0.0609387	6.22739	0.274793					19065088	0.0950344	0.0323411	0.0378548	0.0103135	0.54753	0.0444688	0.0186098	0.00602788	0.0775622	0.0127785	0.00561309	0.00247012	0.00157471
343	2022-07-04	Technician 1	22070002	3435470	1192650	1354970	381034	18577300	1499730	584941	173526	NQ	NQ	NQ	NQ	2503260	444809	181149	97802	52714	17816	3001980	374151	128011		0.730681	30.2842	-0.136272	0.0433047	6.3545	0.265307					34001313	0.101039	0.0350766	0.0398505	0.0112064	0.54637	0.044108	0.0172035	0.00510351	0.0736225	0.0130821	0.00532771	0.00287642	0.00155035
344	2022-07-07	Technician 1	22070028	3343650	1149570	1363290	376978	18406900	1554370	624748	196854	NQ	NQ	NQ	NQ	2535720	382936	175159	100676	54465	16596	3053840	367751	124591		0.741333	30.8829	-0.129987	0.0569342	6.31975	0.269596					33828094	0.0988424	0.0339827	0.0403005	0.0111439	0.544131	0.0459491	0.0184683	0.00581925	0.074959	0.0113201	0.00517792	0.00297611	0.00161005
360	2022-07-27	Technician 1	22070140	2941460	982495	1131730	302694	16187500	1255200	578540	175653	NQ	NQ	NQ	NQ	2385150	299217	153985	81238	46197	11912	2840690	321747	106524		0.732445	30.3834	-0.135225	0.0464295	6.07844	0.279491			85-150		29801932	0.0987003	0.0329675	0.0379751	0.0101569	0.543169	0.0421181	0.0194128	0.00589401	0.0800334	0.0100402	0.00516695	0.00272593	0.00155013
361	2022-07-27	Technician 1	22070143	3082390	1021870	1169610	297051	16749200	1303890	599115	185562	NQ	NQ	NQ	NQ	2504020	311220	168627	75000	45599	13605	2900010	327325	107882		0.730549	30.2769	-0.13635	0.0466231	5.81106	0.279577			85-150		30861976	0.0998766	0.033111	0.0378981	0.00962515	0.542713	0.0422491	0.0194127	0.00601264	0.0811361	0.0100843	0.00546391	0.00243017	0.00147751
379	2022-10-10	Technician 1	22100012	1780360	571628	664149	167161	9334830	751639	348990	98430	NQ	NQ	NQ	NQ	1455460	191851	95999	50060	27203	7491	1709280	199802	65961		0.734691	30.5097	-0.133895	0.0524284	6.00461	0.289524					17520294	0.101617	0.0326266	0.0379074	0.00954099	0.532801	0.042901	0.0199192	0.00561806	0.0830728	0.0109502	0.0054793	0.00285726	0.00155266
380	2022-10-10	Technician 1	22100013	1754700	583011	658441	171790	9358330	744217	344484	102329	NQ	NQ	NQ	NQ	1475500	193941	101018	49427	26116	7847	1734690	200070	70441		0.72977	30.2331	-0.136814	0.0469118	6.02479	0.291533					17576352	0.099833	0.0331702	0.0374618	0.00977393	0.532439	0.0423419	0.0195993	0.00582197	0.083948	0.0110342	0.00574738	0.00281213	0.00148586
398	2022-10-27	Technician 1	22100120	1774110	554345	632009	168630	8715590	694453	335993	98118	NQ	NQ	NQ	NQ	1409710	174810	101664	42816	24778	8134	1652530	186188	64128		0.729514	30.2187	-0.136967	0.0427338	5.94255	0.296378					16638006	0.10663	0.033318	0.0379859	0.0101352	0.523836	0.041739	0.0201943	0.00589722	0.0847283	0.0105067	0.00611035	0.00257339	0.00148924
399	2022-10-27	Technician 1	22100122	1877070	593925	668982	180050	9321070	748835	362378	108176	NQ	NQ	NQ	NQ	1472570	192330	98867	49595	28158	5641	1721610	198747	67750		0.729023	30.1911	-0.137259	0.0442872	5.96284	0.292687					17695754	0.106075	0.0335631	0.0378047	0.0101748	0.52674	0.0423172	0.0204782	0.0061131	0.083216	0.0108687	0.00558705	0.00280265	0.00159123
400	2022-10-27	Technician 1	22100124	1930110	616916	695779	185824	9678920	760665	378785	113181	NQ	NQ	NQ	NQ	1540260	197507	104225	45974	28416	9299	1818980	207932	71932		0.72693	30.0735	-0.138508	0.0397818	6.04369	0.294932					18384705	0.104985	0.0335559	0.0378455	0.0101075	0.526466	0.0413749	0.0206033	0.00615626	0.0837794	0.010743	0.00566911	0.00250067	0.00154563
403	2022-11-02	Technician 1	22100173	777676	254836	285322	73260	3774370	307675	149720	45012	NQ	NQ	NQ	NQ	611381	83881	43728	21407	11671	3370	718594	86964	27751		0.723333	29.8713	-0.140662	0.0358853	6.06628	0.29883					7276618	0.106873	0.0350212	0.0392108	0.0100679	0.518698	0.0422827	0.0205755	0.00618584	0.0840199	0.0115275	0.00600939	0.00294189	0.0016039
404	2022-11-02	Technician 1	22100150	1501070	486222	534700	144739	7388810	603779	292564	85491	NQ	NQ	NQ	NQ	1198010	146234	81678	40442	24148	6307	1400170	163558	53658		0.725211	29.9769	-0.139535	0.0417282	5.9564	0.297059					14151580	0.106071	0.0343581	0.0377838	0.0102278	0.522119	0.0426651	0.0206736	0.00604109	0.0846556	0.0103334	0.00577165	0.00285777	0.00170638
409	2022-11-14	Technician 1	22110002	2595240	816990	924238	234375	12661700	985772	456435	131274	NQ	NQ	NQ	NQ	1943880	259400	134956	57011	35214	9432	2242380	264044	89359		0.724118	29.9154	-0.140191	0.0356031	5.86517	0.28445			70-150		23841700	0.108853	0.0342673	0.0387656	0.00983047	0.531074	0.0413465	0.0191444	0.00550607	0.0815328	0.0108801	0.0056605	0.00239123	0.00147699
410	2022-11-14	Technician 1	22110003	2486900	785208	888836	234300	12234600	976687	453245	135392	NQ	NQ	NQ	NQ	1916740	246287	131136	63875	36219	8682	2226470	248883	87661		0.727834	30.1243	-0.137968	0.041526	5.85856	0.289212			70-150		23161121	0.107374	0.033902	0.0383762	0.0101161	0.528239	0.0421692	0.0195692	0.00584566	0.0827568	0.0106336	0.0056619	0.00275785	0.00156378
411	2022-11-17	Technician 1	22110007	726685	208491	250605	70528	3440020	267566	119404	32836	NQ	NQ	NQ	NQ	504380	68729	36486	15538	10335	2550	597714	69840	23524		0.738468	30.7219	-0.131669	0.0459256	6.09916	0.277775					6445231	0.112748	0.0323481	0.0388822	0.0109427	0.533731	0.0415138	0.0185259	0.00509462	0.0782563	0.0106635	0.00566093	0.00241077	0.00160351
413	2022-11-30	Technician 1	22110134	928320	290479	325581	91606	4445710	364230	164254	46250	NQ	NQ	NQ	NQ	688799	94008	45218	26139	14247	3505	793777	93787	32978		0.729004	30.1901	-0.13727	0.0430545	5.89063	0.286723					8448888	0.109875	0.0343807	0.0385354	0.0108424	0.526189	0.0431098	0.0194409	0.00547409	0.0815254	0.0111267	0.00535195	0.00309378	0.00168626
424	2022-12-22	Technician 1	22120167	2687790	878960	999603	258245	14168400	1142020	493841	149691	NQ	NQ	NQ	NQ	2113750	300315	140977	69484	41302	11596	2500270	283571	91877		0.731929	30.3544	-0.135531	0.0504219	6.00912	0.28175					26331692	0.102074	0.0333803	0.037962	0.00980738	0.538074	0.0433706	0.0187546	0.00568482	0.080274	0.0114051	0.00535389	0.0026388	0.00156853
425	2022-12-22	Technician 1	22120159	2607340	858366	974963	260386	13801700	1081510	485435	143508	NQ	NQ	NQ	NQ	2069250	262408	150330	55760	40468	10871	2458150	280140	98603		0.729668	30.2273	-0.136875	0.043982	6.09672	0.281926					25639188	0.101694	0.0334787	0.0380263	0.0101558	0.538305	0.0421819	0.0189333	0.00559721	0.0807065	0.0102346	0.00586329	0.0021748	0.00157837
450	2023-10-25	Technician 1	23100136	3147210	1024170	1154500	312671	15931600	1260490	579641	176566	NQ	NQ	NQ	NQ	2416030	288646	156121	77796	46608	12891	2791570	319008	104603		0.727021	30.0786	-0.138453	0.0393572	5.80663	0.281844					29800121	0.105611	0.034368	0.0387415	0.0104923	0.534615	0.0422982	0.019451	0.00592501	0.0810745	0.00968607	0.00523894	0.00261059	0.00156402
455	2023-11-10	Technician 1	23110047	4182660	1346770	1538770	411662	21205300	1730700	749203	252236	NQ	NQ	NQ	NQ	3046860	495201	203233	102542	61605	16940	3608840	402199	140500		0.732141	30.3663	-0.135405	0.0478358	6.0489	0.277691					39495221	0.105903	0.0340996	0.0389609	0.0104231	0.536908	0.0438205	0.0189695	0.00638649	0.077145	0.0125383	0.00514576	0.00259631	0.00155981
456	2023-11-20	Technician 1	23110065	3270020	1044540	1199340	304775	16478900	1327880	611742	179538	NQ	NQ	NQ	NQ	2517440	277604	170734	76136	47638	14057	2905620	327870	112643	12173800	0.730548	30.2768	-0.136351	0.0457814	5.79645	0.282617	1.35364	0.0502507			30866477	0.105941	0.0338406	0.0388557	0.00987398	0.533877	0.0430201	0.019819	0.0058166	0.081559	0.00899371	0.00553137	0.00246662	0.00154336
476	2023-11-20	Technician 1	23110084	812535	270549	296965	78724	4018190	315143	158732	48195	NQ	NQ	NQ	NQ	638009	94875	46195	20427	12224	3422	747085	87852	30164	3306280	0.718583	29.6044	-0.143523	0.02898	6.02602	0.295683	1.21532	0.0480092			7679286	0.105809	0.035231	0.0386709	0.0102515	0.52325	0.0410381	0.0206702	0.00627597	0.0830818	0.0123547	0.00601553	0.00266001	0.00159181
479	2023-11-23	Technician 1	23110106	1320180	422818	465326	124815	6317650	499348	239428	75615	NQ	NQ	NQ	NQ	1021790	113163	75297	23618	20420	6299	1150610	130335	45158	5181820	0.720415	29.7073	-0.142417	0.031631	5.57831	0.291605	1.2192	0.0462054			12051870	0.109542	0.0350832	0.0386103	0.0103565	0.524205	0.0414332	0.0198665	0.00627413	0.0847827	0.00938966	0.00624774	0.0019597	0.00169434
498	2023-11-30	Technician 1	23110139	6418670	2081550	2370300	617722	33887800	2640240	1223560	365511	NQ	NQ	NQ	NQ	5098910	672828	336745	157558	96752	28308	6077535	671261	218694		0.730013	30.2467	-0.136669	0.045403	6.03308	0.283952			75-150		62963944	0.101942	0.0330594	0.0376454	0.00981073	0.53821	0.0419326	0.0194327	0.00580508	0.0809814	0.0106859	0.00534822	0.00250235	0.00153663
499	2023-11-30	Technician 1	23110140	6675180	2196190	2480620	624847	36172700	2837570	1294690	380325	NQ	NQ	NQ	NQ	5409990	701396	339496	183816	102696	31508	6316880	700356	235775		0.730172	30.2557	-0.136575	0.0495968	5.86674	0.280517			75-150		66684035	0.100102	0.0329343	0.0371996	0.00937026	0.542449	0.0425525	0.0194153	0.00570339	0.0811287	0.0105182	0.00509111	0.00275652	0.00154004
509	2023-12-05	Technician 1	23120004	4189850	1355630	1567820	407252	22030600	1802050	802791	279020	NQ	NQ	NQ	NQ	3404330	505131	217164	119253	60192	20248	3985110	445975	149677	9845650	0.735886	30.5768	-0.133189	0.0546252	5.91673	0.289496	2.2376	0.0815376			41342093	0.101346	0.0327906	0.0379231	0.00985078	0.532885	0.0435887	0.0194182	0.00674905	0.0823454	0.0122183	0.00525285	0.00288454	0.00145595
510	2023-12-05	Technician 1	23120005	4246640	1413000	1565860	392700	22714000	1736860	833821	257697	NQ	NQ	NQ	NQ	3513080	437636	221302	115419	67642	17084	4040510	454387	152661	10259000	0.723398	29.875	-0.140623	0.0398329	5.74968	0.28565	2.21406	0.081277			42180299	0.100678	0.0334991	0.037123	0.00931003	0.538498	0.041177	0.019768	0.00610942	0.0832872	0.0103754	0.00524657	0.00273632	0.00160364
539	2024-02-01	Technician 1	24010139	6782660	2275380	2650090	710360	36461300	3048970	1261900	409722	NQ	NQ	NQ	NQ	5396050	690778	359057	169479	107764	25593	6272960	736525	248126	14216700	0.738004	30.6958	-0.131941	0.0558608	5.92954	0.27789	2.56468	0.0887618	85-150		67606714	0.100325	0.0336561	0.0391986	0.0105072	0.539315	0.0450986	0.0186653	0.00606037	0.0798153	0.0102176	0.00531097	0.00250684	0.00159398
540	2024-02-01	Technician 1	24010140	6667530	2305490	2571420	673273	36641900	3067630	1257870	389826	NQ	NQ	NQ	NQ	5425860	645055	374034	147862	98829	31957	6283760	721962	246719	14096300	0.732474	30.385	-0.135208	0.0558819	5.85525	0.276485	2.5994	0.0892341	85-150		67550977	0.0987037	0.0341296	0.0380664	0.00996689	0.542433	0.0454121	0.018621	0.00577084	0.0803225	0.00954916	0.00553706	0.0021889	0.00146303
150	2019-03-15	Technician 2	19030044	617376	206845	251623	65884	3217590	242231	103757	36481	NQ	NQ	NQ	NQ	455898	70840	28611	11055	8276	2941	535931	51092	15544		0.730173	30.2557	-0.136574	0.0283619	5.64302	0.27212					5921975	0.104252	0.0349284	0.0424897	0.0111253	0.543331	0.0409038	0.0175207	0.00616028	0.0769841	0.0119622	0.00483133	0.00186678	0.00139751
151	2019-03-15	Technician 2	19030041	526809	179153	209393	54276	2736210	221266	84077	24041	NQ	NQ	NQ	NQ	373578	47981	22106	10336	8034	1782	431474	39310	11775		0.730227	30.2588	-0.136542	0.0394543	5.38437	0.259956					4981601	0.105751	0.0359629	0.0420333	0.0108953	0.549263	0.0444166	0.0168775	0.00482596	0.0749916	0.00963164	0.00443753	0.00207483	0.00161273
156	2019-03-20	Technician 2	19030055	506447	170447	199629	55685	2524080	213329	87705	23108	NQ	NQ	NQ	NQ	377301	58454	29147	10439	7955	2154	455315	51018	16713		0.733297	30.4313	-0.13472	0.0416763	6.17954	0.284145					4788926	0.105754	0.0355919	0.0416855	0.0116279	0.527066	0.0445463	0.0183141	0.0048253	0.0787861	0.0122061	0.00608633	0.00217982	0.00166112
157	2019-04-01	Technician 2	19030079	801307	265194	320089	89470	4057610	315249	142936	44926	NQ	NQ	NQ	NQ	616506	87984	43931	19605	14435	2722	730732	80478	27385		0.732128	30.3656	-0.135413	0.0310782	6.00524	0.285719					7660559	0.104602	0.0346181	0.041784	0.0116793	0.529675	0.0411522	0.0186587	0.00586459	0.0804779	0.0114853	0.0057347	0.00255921	0.00188433
158	2019-04-02	Technician 2	19030154	310614	103940	117620	35079	1480810	131531	58778	19753	NQ	NQ	NQ	NQ	236771	33631	16640	8805	4684	2036	274526	29442	9924		0.732231	30.3714	-0.135352	0.0443473	5.76952	0.296283					2874584	0.108055	0.0361583	0.0409172	0.0122032	0.515139	0.0457565	0.0204475	0.0068716	0.082367	0.0116994	0.00578866	0.00306305	0.00162945
160	2019-04-26	Technician 2	19040068	352402	121153	141830	38435	1750280	148517	68353	20271	NQ	NQ	NQ	NQ	279194	42503	16892	10418	5618		331442	35229	12350		0.730732	30.2872	-0.136242	0.0377388	5.97815	0.297653					3374887	0.104419	0.0358984	0.0420251	0.0113885	0.518619	0.0440065	0.0202534	0.00600642	0.0827269	0.0125939	0.0050052	0.00308692	0.00166465
162	2019-05-06	Technician 2	19050034	515614	173236	199001	58471	2775890	232539	100099	31641	NQ	NQ	NQ	NQ	427978	59789	29856	13590	9472		507007	55997	19793		0.738806	30.7409	-0.131469	0.0560229	6.02347	0.288672					5209973	0.0989667	0.0332508	0.0381962	0.0112229	0.532803	0.0446334	0.019213	0.00607316	0.0821459	0.0114759	0.00573055	0.00260846	0.00181805
168	2019-07-15	Technician 2	19070012	1629738	557860	665228	182488	8611016	711865	296708	93551	NQ	NQ	NQ	NQ	1239442	162908	87503	43716	26510	7170	1435378	172446	58108		0.73654	30.6136	-0.132803	0.0451536	5.94525	0.272657					15981635	0.101976	0.0349063	0.0416245	0.0114186	0.538807	0.0445427	0.0185656	0.00585366	0.0775541	0.0101935	0.00547522	0.00273539	0.00165878
169	2019-07-16	Technician 2	19070022	1557544	529382	637867	176990	8109110	683693	293544	94664	NQ	NQ	NQ	NQ	1178240	156210	87317	36389	23798	7028	1359592	163100	57422		0.738955	30.7493	-0.131382	0.0471947	5.941	0.275413					15151890	0.102795	0.0349383	0.0420982	0.0116811	0.535188	0.0451226	0.0193734	0.00624767	0.0777619	0.0103096	0.00576278	0.00240161	0.00157063
170	2019-07-19	Technician 2	19070033	1527337	512298	623931	171545	7879201	667387	288693	92293	NQ	NQ	NQ	NQ	1176650	144113	84482	39297	25542	6412	1345505	163121	55056		0.74063	30.8434	-0.130399	0.048671	5.84726	0.278888					14802863	0.103178	0.034608	0.0421493	0.0115886	0.532275	0.045085	0.0195025	0.00623481	0.079488	0.00973548	0.00570714	0.00265469	0.00172548
171	2019-07-19	Technician 2	19070035	1880971	639479	767419	208501	9785459	827981	339360	108345	NQ	NQ	NQ	NQ	1423642	179666	102896	47682	31258	11543	1654732	196252	64781		0.738281	30.7114	-0.131778	0.0479329	5.94196	0.274679					18269967	0.102954	0.0350017	0.0420044	0.0114122	0.535604	0.0453192	0.0185747	0.00593022	0.0779225	0.00983395	0.00563198	0.00260986	0.0017109
180	2019-10-28	Technician 2	19100034	1558570	533539	629211	176182	8042140	645571	295812	87689	NQ	NQ	NQ	NQ	1184150	154592	86418	40477	25591	7938	1384010	164698	57213		0.731147	30.3105	-0.135995	0.0348981	6.03306	0.278628					15073801	0.103396	0.0353951	0.041742	0.011688	0.533518	0.0428274	0.0196242	0.00581731	0.0785568	0.0102557	0.00573299	0.00268526	0.00169771
183	2020-01-28	Technician 2	20010006	761581	256854	296378	84443	3958610	327315	149647	46438	NQ	NQ	NQ	NQ	577542	70212	41500	19656	12489	3445	671991	83788	28400		0.733827	30.4611	-0.134406	0.0455173	6.06767	0.276892					7390289	0.103052	0.0347556	0.0401037	0.0114262	0.53565	0.0442899	0.0202491	0.00628365	0.0781488	0.00950058	0.00561548	0.00265971	0.00168992
184	2020-02-10	Technician 2	20020003	1021120	336242	396905	111894	5172400	427015	192260	55342	NQ	NQ	NQ	NQ	763532	99075	53974	26647	17124	4850	891263	107588	37093		0.73567	30.5647	-0.133317	0.0443118	6.0432	0.278995					9714324	0.105115	0.034613	0.0408577	0.0115185	0.532451	0.0439573	0.0197914	0.00569695	0.0785986	0.0101989	0.00555613	0.00274306	0.00176276
185	2020-02-12	Technician 2	20020021	671891	228238	267842	79223	3482110	294777	135104	39972	NQ	NQ	NQ	NQ	535716	67929	39845	18425	11738	3024	619906	74202	26640		0.737682	30.6777	-0.132131	0.0475315	5.97265	0.286561					6596582	0.101854	0.0345994	0.0406031	0.0120097	0.527866	0.0446863	0.0204809	0.0060595	0.0812111	0.0102976	0.00604025	0.00279311	0.00177941
186	2020-02-12	Technician 2	20020019	642903	217261	266641	71997	3298640	264973	129458	37130	NQ	NQ	NQ	NQ	508042	62273	37870	16844	11037	3168	584851	69321	22977		0.735329	30.5455	-0.133518	0.0357613	5.85964	0.28607					6245386	0.10294	0.0347874	0.0426941	0.011528	0.528172	0.042427	0.0207286	0.00594519	0.0813468	0.00997104	0.00606368	0.00269703	0.00176722
187	2020-02-12	Technician 2	20020023	837205	284271	332507	92685	4280090	348387	167407	48700	NQ	NQ	NQ	NQ	653038	85875	46055	24680	14032	3629	746748	89949	31651		0.731275	30.3176	-0.135919	0.0375749	5.86805	0.284488					8086909	0.103526	0.035152	0.0411167	0.0114611	0.529262	0.0430804	0.020701	0.00602208	0.0807525	0.010619	0.00569501	0.00305185	0.00173515
188	2020-02-21	Technician 2	20020066	604803	209849	243915	69049	3147460	269842	120057	37180	NQ	NQ	NQ	NQ	469643	64720	34145	17519	9227	2604	539691	65364	23419		0.735258	30.5415	-0.13356	0.0471776	5.93802	0.281197					5928487	0.102016	0.0353967	0.0411429	0.011647	0.530904	0.0455162	0.0202509	0.00627141	0.079218	0.0109168	0.00575948	0.00295505	0.00155638
189	2020-02-24	Technician 2	20020108	425796	141877	167088	46558	2199770	188879	86613	25464	NQ	NQ	NQ	NQ	326789	42630	24426	12156	7190	2354	383283	46549	16849		0.739389	30.7737	-0.131127	0.0539252	6.13664	0.282188					4144271	0.102743	0.0342345	0.0403178	0.0112343	0.530798	0.0455759	0.0208995	0.00614439	0.0788532	0.0102865	0.00589392	0.00293321	0.00173493
190	2020-02-26	Technician 2	20020111	442307	149359	176049	47117	2198570	183518	86418	28158	NQ	NQ	NQ	NQ	332706	40112	23552	10780	7780		378702	46787	15324		0.731389	30.3241	-0.135851	0.0381017	5.82956	0.282607					4167239	0.106139	0.0358412	0.042246	0.0113065	0.527584	0.0440383	0.0207375	0.00675699	0.0798385	0.00962556	0.0056517	0.00258684	0.00186694
191	2020-03-09	Technician 2	20030002	539140	182193	211237	59840	2732960	232991	104507	32156	NQ	NQ	NQ	NQ	408365	47453	31509	14064	9926	2090	473604	58598	19348		0.734514	30.4997	-0.134	0.0461322	6.00711	0.280619					5159981	0.104485	0.0353089	0.0409376	0.0115969	0.529645	0.0451535	0.0202534	0.00623181	0.0791408	0.00919635	0.00610642	0.00272559	0.00192365
192	2020-04-21	Technician 2	20040004	433609	145006	170372	47736	2166839	195406	82035	22453	NQ	NQ	NQ	NQ	327931	38684	25074	11574	7153		379137	44877	15193		0.740375	30.8291	-0.130549	0.0564472	5.90114	0.281809					4113079	0.105422	0.0352549	0.041422	0.0116059	0.526817	0.0475084	0.0199449	0.00545893	0.0797288	0.00940512	0.00609616	0.00281395	0.00173909
194	2020-05-08	Technician 2	20050082	388769	134518	151129	43566	1924994	172420	81540	24412	NQ	NQ	NQ	NQ	308179	40971	21495	10644	6388		346951	41083	14379		0.73184	30.3494	-0.135584	0.0473252	5.69421	0.29411					3711438	0.104749	0.0362442	0.0407198	0.0117383	0.518665	0.0464564	0.0219699	0.0065775	0.0830349	0.0110391	0.00579156	0.00286789	0.00172117
213	2020-06-30	Technician 2	20060059	1049090	342684	415567	112026	5796720	409751	211195	58296	NQ	NQ	NQ	NQ	887985	113503	65701	28082	18150	5260	1049510	121100	42872		0.732284	30.3744	-0.13532	0.0322415	6.07898	0.285873			100-150		10727492	0.0977945	0.0319445	0.0387385	0.0104429	0.540361	0.0381963	0.0196873	0.00543426	0.0827766	0.0105806	0.00612454	0.00261776	0.00169191
215	2020-07-01	Technician 2	20060061	1245900	407628	469842	120306	6705060	492824	249795	71936	NQ	NQ	NQ	NQ	1061330	139143	73488	32283	21430	5611	1242890	146061	50098		0.726534	30.0512	-0.138744	0.0355842	6.00833	0.29198			100-150		12535625	0.0993887	0.0325176	0.0374805	0.00959713	0.53488	0.0393139	0.0199268	0.00573853	0.0846651	0.0110998	0.00586233	0.0025753	0.00170953
216	2020-07-01	Technician 2	20070001	2462300	799029	944969	256090	13331000	944640	426042	125543	NQ	NQ	NQ	NQ	1889113	246557	133894	59634	37383	10629	2261957	250964	86497		0.728658	30.1706	-0.137476	0.0305197	6.1075	0.270741			100-150		24266241	0.10147	0.0329276	0.0389417	0.0105533	0.549364	0.0389282	0.017557	0.00517357	0.0778494	0.0101605	0.00551771	0.00245749	0.00154054
217	2020-07-03	Technician 2	20070023	2080630	678541	800410	206939	11205400	817342	388873	109266	NQ	NQ	NQ	NQ	1613580	216307	111932	53390	33707	8723	1965120	222588	77074		0.728934	30.1861	-0.137312	0.0343601	6.31	0.277003					20589822	0.101051	0.0329552	0.0388741	0.0100505	0.54422	0.0396964	0.0188867	0.0053068	0.0783678	0.0105055	0.00543628	0.00259303	0.00163707
218	2020-07-07	Technician 2	20070058	2793180	903503	1085430	287028	15074800	1138150	528864	155998	NQ	NQ	NQ	NQ	2263320	256973	146767	71395	44066	15284	2753080	301887	99978		0.735362	30.5474	-0.133499	0.0426141	6.20653	0.28328					27919703	0.100043	0.0323608	0.0388768	0.0102805	0.539934	0.0407651	0.0189423	0.00558738	0.0810653	0.009204	0.00525675	0.00255715	0.00157831
220	2020-08-07	Technician 2	20080003	5013399	1588810	1874740	476199	26746600	1961990	910032	267235	NQ	NQ	NQ	NQ	4196190	453285	256305	127793	75255	23356	4885640	533837	178956		0.73079	30.2904	-0.136208	0.0393038	5.7857	0.285976					49569622	0.101139	0.0320521	0.0378203	0.00960667	0.539576	0.0395805	0.0183587	0.0053911	0.0846525	0.00914441	0.00517061	0.00257805	0.00151817
221	2020-09-02	Technician 2	20090003	11161505	3728560	4453160	1136910	65996400	4847510	2075500	543533	NQ	NQ	NQ	NQ	9527780	1157810	588943	286867	178686	46153	11289600	1208890	391791		0.736798	30.628	-0.132652	0.0492477	5.9004	0.271488					118619598	0.0940949	0.0314329	0.0375415	0.0095845	0.55637	0.040866	0.0174971	0.00458215	0.0803221	0.0097607	0.00496497	0.00241838	0.00150638
223	2020-10-16	Technician 2	20100017	5103645	1629150	1977750	500254	28757200	2185080	932141	262565	NQ	NQ	NQ	NQ	4359890	439038	285985	116290	86402	23758	5092520	556135	196154		0.741086	30.869	-0.130132	0.0551323	5.83737	0.278243					52503957	0.097205	0.0310291	0.0376686	0.00952793	0.547715	0.0416174	0.0177537	0.00500086	0.0830393	0.008362	0.00544692	0.00221488	0.00164563
225	2020-12-02	Technician 2	20120007	6299750	2090200	2526440	646707	36054100	2803300	1244230	369127	NQ	NQ	NQ	NQ	5760930	710338	359350	172839	101968	30484	6774690	716359	252895		0.740884	30.8577	-0.13025	0.0551811	5.8566	0.291855					66913707	0.0941474	0.0312372	0.0377567	0.00966479	0.538815	0.0418943	0.0185945	0.00551646	0.0860949	0.0106157	0.00537035	0.00258301	0.00152387
227	2020-12-07	Technician 2	20120061	6402900	2096430	2563670	636100	36619600	2713610	1275710	353310	NQ	NQ	NQ	NQ	5656960	770699	364027	157502	103682	33519	6617190	729354	241527		0.738267	30.7106	-0.131786	0.0478714	5.85517	0.286077					67335790	0.0950891	0.031134	0.0380729	0.00944669	0.543836	0.0402997	0.0189455	0.00524699	0.0840112	0.0114456	0.00540614	0.00233905	0.00153978
228	2020-12-14	Technician 2	20120148	6575850	2197140	2668020	678702	37215800	2809990	1357970	376906	NQ	NQ	NQ	NQ	5987364	718620	376979	192015	108407	31481	6945120	762613	247023		0.736991	30.6389	-0.132538	0.0455364	5.75354	0.292499					69250000	0.0949581	0.0317277	0.0385274	0.00980075	0.537412	0.0405775	0.0196097	0.00544269	0.0864601	0.0103772	0.00544374	0.00277278	0.00156544
229	2020-12-21	Technician 2	20120229	6162240	2039200	2404470	636092	33961200	2513380	1255020	360813	NQ	NQ	NQ	NQ	5649080	660198	360955	169610	105191	32605	6617040	716265	239410		0.731442	30.327	-0.13582	0.038758	5.83231	0.299817					63882769	0.0964617	0.031921	0.0376388	0.00995718	0.531618	0.0393436	0.0196457	0.00564805	0.0884289	0.0103345	0.00565027	0.00265502	0.00164663
230	2020-12-23	Technician 2	20120256	6778040	2289248	2691430	682954	38082900	2878090	1412390	414723	NQ	NQ	NQ	NQ	6237950	758976	399254	201301	110047	32570	7283730	799580	268049		0.731992	30.358	-0.135494	0.0429569	5.83487	0.297242					71321232	0.0950354	0.0320977	0.0377367	0.00957575	0.533963	0.0403539	0.0198032	0.00581486	0.0874627	0.0106417	0.00559797	0.00282246	0.00154298
232	2021-02-16	Technician 2	21020003	3805400	1246540	1460550	352328	20722000	1574840	725970	217206	NQ	NQ	NQ	NQ	3493590	412450	217586	114954	67484	21409	4013000	450101	151367		0.731016	30.3031	-0.136073	0.0442684	5.71026	0.299559					39046775	0.0974575	0.0319243	0.0374051	0.00902323	0.530697	0.0403321	0.0185923	0.00556271	0.0894719	0.010563	0.00557244	0.00294401	0.00172829
233	2021-02-17	Technician 2	21020008	4373090	1436450	1691310	430052	23959402	1791170	842199	241991	NQ	NQ	NQ	NQ	3929931	519120	252476	129448	75626	23005	4590260	498523	172035		0.731454	30.3277	-0.135813	0.0412749	5.83312	0.297026					44956088	0.0972747	0.0319523	0.0376214	0.00956605	0.532951	0.0398427	0.0187338	0.00538283	0.0874171	0.0115473	0.00561606	0.00287943	0.00168222
234	2021-03-08	Technician 2	21030028	3630379	1195700	1423430	373444	20480600	1523530	727556	208260	NQ	NQ	NQ	NQ	3283470	460174	220719	109885	63302	19047	3965800	434019	148745		0.735236	30.5403	-0.133573	0.045146	6.16034	0.296824					38268060	0.0948671	0.0312454	0.0371963	0.00975863	0.535188	0.0398121	0.0190121	0.00544214	0.0858018	0.012025	0.00576771	0.00287145	0.00165417
235	2021-03-17	Technician 2	21030070	3130570	997205	1205400	318716	17081100	1264250	646711	195317	NQ	NQ	NQ	NQ	2767010	408512	184055	96206	53093	20537	3383650	384238	122238		0.736577	30.6156	-0.132782	0.0437216	6.30826	0.302308					32258808	0.0970454	0.0309126	0.0373665	0.00987997	0.529502	0.0391908	0.0200476	0.00605469	0.0857753	0.0126636	0.00570557	0.00298232	0.00164585
236	2021-03-18	Technician 2	21030080	5452050	1784720	2164920	538522	29866900	2204090	1120280	328934	NQ	NQ	NQ	NQ	4923880	726452	327795	157227	95852	28912	5933600	649193	209314		0.733315	30.4323	-0.134709	0.0387946	6.1119	0.303803					56512641	0.0964749	0.0315809	0.0383086	0.00952923	0.528499	0.0390017	0.0198235	0.00582054	0.0871288	0.0128547	0.00580038	0.00278216	0.00169612
246	2021-03-30	Technician 2	21030140	4104750	1356420	1660030	400737	22692900	1673811	789886	220601	NQ	NQ	NQ	NQ	3573410	521819	232699	128672	71870	21565	4262660	472680	156487		0.733565	30.4464	-0.134561	0.0385728	6.05231	0.292202			90-150		42340997	0.096945	0.0320356	0.0392062	0.00946451	0.535956	0.0395317	0.0186553	0.0052101	0.084396	0.0123242	0.00549583	0.00303895	0.00169741
247	2021-03-30	Technician 2	21030141	4262800	1376680	1652110	433274	23337100	1729630	788529	236876	NQ	NQ	NQ	NQ	3608360	460979	227914	124095	68732	21115	4256110	462234	161442		0.73483	30.5175	-0.133813	0.042161	5.93213	0.286064			90-150		43207980	0.0986577	0.0318617	0.0382362	0.0100276	0.540111	0.0400303	0.0182496	0.00548223	0.0835114	0.0106688	0.00527481	0.00287204	0.00159072
248	2021-03-30	Technician 2	21030142	4260420	1386820	1635860	413647	22993600	1730580	797973	240953	NQ	NQ	NQ	NQ	3468290	553473	221525	126105	66572	16807	4255050	465657	153235		0.731596	30.3357	-0.135729	0.0414073	6.29211	0.28833			90-150		42786567	0.0995738	0.0324125	0.038233	0.00966768	0.537402	0.0404468	0.0186501	0.00563151	0.0810603	0.0129357	0.00517744	0.0029473	0.00155591
252	2021-04-06	Technician 2	21040003	4517810	1493480	1767150	441902	24481100	1842326	835555	246802	NQ	NQ	NQ	NQ	3684640	623977	232898	120101	71236	25449	4489070	492313	161637		0.730655	30.2828	-0.136288	0.0391039	6.23166	0.287535			90-150		45527446	0.0992327	0.0328039	0.038815	0.00970628	0.537722	0.0404663	0.0183528	0.00542095	0.0809323	0.0137055	0.00511555	0.00263799	0.00156468
253	2021-04-06	Technician 2	21040005	4410690	1467610	1708920	442948	24436300	1812570	865352	255640	NQ	NQ	NQ	NQ	3735380	558083	236169	130334	73482	20103	4449020	489088	161999		0.729824	30.2361	-0.136782	0.0395357	6.02978	0.287567			90-150		45253688	0.0974659	0.0324307	0.0377631	0.00978811	0.539985	0.0400535	0.0191222	0.00564904	0.0825431	0.0123323	0.00521878	0.00288007	0.00162378
254	2021-04-06	Technician 2	21040007	4455970	1481830	1736350	444341	24262400	1802050	848167	251367	NQ	NQ	NQ	NQ	3793690	498381	233967	131708	71398	24345	4448760	489712	163398		0.72883	30.1802	-0.137374	0.0364019	5.88096	0.28855			90-150		45137834	0.0987192	0.032829	0.0384677	0.00984409	0.537518	0.0399233	0.0187906	0.00556888	0.0840468	0.0110413	0.00518339	0.00291791	0.00158178
255	2021-04-12	Technician 2	21040034	3032170	989489	1202930	300163	16513900	1257130	595439	172181	NQ	NQ	NQ	NQ	2481490	413494	176056	77973	46526	17900	3031570	339934	116148		0.736116	30.5897	-0.133054	0.0442947	6.32233	0.288442					30764493	0.0985607	0.0321633	0.0391012	0.0097568	0.536784	0.040863	0.0193547	0.00559674	0.0806608	0.0134406	0.0057227	0.00253451	0.00151233
256	2021-04-13	Technician 2	21040037	4018340	1297420	1539030	376222	21209900	1590400	724564	216706	NQ	NQ	NQ	NQ	3260710	480577	206322	115249	59772	19677	3839900	423554	131233		0.729877	30.2391	-0.13675	0.0379024	5.89239	0.286639					39509576	0.101705	0.0328381	0.0389533	0.0095223	0.536829	0.0402535	0.0183389	0.0054849	0.0825296	0.0121636	0.00522208	0.00291699	0.00151285
257	2021-04-21	Technician 2	21040100	4450540	1489140	1723340	431027	24641500	1829590	835921	245537	NQ	NQ	NQ	NQ	3674800	557158	246969	114957	70561	18708	4456710	491092	157488		0.727916	30.1289	-0.137919	0.038795	6.18079	0.283919					45435038	0.0979539	0.0327751	0.0379298	0.00948667	0.542346	0.0402683	0.0183982	0.00540413	0.0808803	0.0122627	0.00543565	0.00253014	0.00155301
260	2021-04-23	Technician 2	21040142	2516250	797844	977742	250721	13392200	975172	507503	151349	NQ	NQ	NQ	NQ	2126920	354422	145148	74868	41002	14156	2522810	279235	97389		0.734183	30.4811	-0.134196	0.0364344	6.04447	0.297189					25224731	0.0997533	0.0316294	0.0387612	0.00993949	0.530915	0.0386594	0.0201193	0.00600002	0.0843188	0.0140506	0.00575419	0.00296804	0.00162547
261	2021-04-23	Technician 2	21040145	2641270	854105	1031950	255614	14319500	1079400	521919	157161	NQ	NQ	NQ	NQ	2182120	340997	144262	79475	40804	14083	2656990	299072	86852		0.734838	30.5179	-0.133808	0.0434393	6.21343	0.290365					26705574	0.0989033	0.0319823	0.0386417	0.00957156	0.536199	0.0404185	0.0195434	0.00588495	0.0817103	0.0127688	0.00540194	0.00297597	0.00152792
262	2021-04-23	Technician 2	21040146	2579030	854808	1017590	254838	14086800	1059080	507892	151881	NQ	NQ	NQ	NQ	2200120	330479	148242	78035	44230	12385	2639340	293892	99921		0.731725	30.343	-0.135652	0.0398212	6.13385	0.292707					26358563	0.0978441	0.03243	0.0386057	0.00966813	0.53443	0.0401797	0.0192686	0.00576211	0.0834689	0.0125378	0.00562405	0.00296052	0.00167801
263	2021-04-28	Technician 2	21040197	2554960	828251	970428	261267	13829600	1012270	514423	145791	NQ	NQ	NQ	NQ	2093470	324441	145527	75239	42960	13280	2582700	289602	96919		0.730406	30.2688	-0.136436	0.0371602	6.39927	0.290441					25781128	0.0991019	0.0321263	0.037641	0.010134	0.536423	0.039264	0.0199535	0.00565495	0.0812016	0.0125844	0.00564471	0.00291838	0.00166634
264	2021-05-03	Technician 2	21040240	3252160	1052850	1257520	333073	17644700	1318930	652610	189500	NQ	NQ	NQ	NQ	2690910	436798	185852	95589	50592	18644	3301440	352023	118967		0.734288	30.487	-0.134134	0.0416518	6.26853	0.291831					32952158	0.0986934	0.0319509	0.038162	0.0101078	0.535464	0.0400256	0.0198048	0.00575076	0.0816611	0.0132555	0.00564006	0.00290084	0.00153532
265	2021-05-07	Technician 2	21050002	4069480	1355230	1595340	409883	22479200	1651130	758492	240730	NQ	NQ	NQ	NQ	3483470	552610	218292	123942	62891	20141	4190380	438180	151253		0.72958	30.2224	-0.136927	0.0366503	6.05483	0.290986					41800644	0.0973545	0.0324213	0.0381654	0.00980566	0.537772	0.0395001	0.0181455	0.005759	0.0833353	0.0132201	0.00522222	0.00296507	0.00150455
266	2021-05-28	Technician 2	21050026	2450940	809525	944255	248172	13102000	993883	443380	126395	NQ	NQ	NQ	NQ	2053540	290700	135726	77658	41319	11729	2441650	274596	92194		0.729783	30.2338	-0.136806	0.0382581	6.05201	0.290159					24537662	0.0998848	0.0329911	0.0384819	0.0101139	0.533955	0.0405044	0.0180694	0.00515106	0.0836893	0.0118471	0.00553133	0.00316485	0.0016839
267	2021-06-02	Technician 2	21060002	2514240	835061	974900	256058	13582800	1013040	484856	127438	NQ	NQ	NQ	NQ	2105680	321953	134823	74778	38735	12972	2545630	279528	95963		0.728793	30.1782	-0.137396	0.0358882	6.18142	0.291395					25398455	0.0989918	0.0328784	0.0383842	0.0100816	0.534788	0.0398859	0.01909	0.00501755	0.0829058	0.0126761	0.00530832	0.00294419	0.00152509
285	2021-10-19	Technician 2	21100032	1045850	365400	431786	116393	5541530	475396	198430	57228	NQ	NQ	NQ	NQ	852633	157821	60104	32011	18611	6880	1030646	123511	42168		0.736928	30.6354	-0.132575	0.0493736	6.35151	0.293018			95-150		10556398	0.0990726	0.0346141	0.0409028	0.0110258	0.524945	0.0450339	0.0187971	0.00542117	0.0807693	0.0149503	0.00569361	0.00303238	0.00176301
286	2021-10-19	Technician 2	21100030	1051350	353235	414290	118045	5710790	456463	191400	58064	NQ	NQ	NQ	NQ	845054	129980	67222	29224	19305	6847	1019630	119933	41609		0.736791	30.6277	-0.132656	0.0478847	6.30172	0.282106			95-150		10632441	0.0988813	0.0332224	0.0389647	0.0111023	0.53711	0.0429312	0.0180015	0.00546102	0.0794788	0.0122249	0.00632235	0.00274857	0.00181567
289	2021-10-22	Technician 2	21100040	1148600	377526	448754	122366	6383790	497137	221579	69353	NQ	NQ	NQ	NQ	953741	126804	66224	40644	20488	6515	1146760	138604	49073		0.738878	30.7449	-0.131427	0.0515716	6.32858	0.282884					11817958	0.0971911	0.0319451	0.0379722	0.0103542	0.540177	0.0420662	0.0187493	0.00586844	0.0807027	0.0107298	0.00560368	0.00343917	0.00173363
290	2021-10-27	Technician 2	21100114	1312390	441953	516629	139925	7072850	559346	246890	74990	NQ	NQ	NQ	NQ	1048100	174492	78330	34915	22010	6820	1271080	144207	52556		0.733418	30.4381	-0.134648	0.044095	6.3149	0.284733					13197483	0.0994424	0.0334877	0.039146	0.0106024	0.535924	0.0423828	0.0187074	0.00568214	0.0794167	0.0132216	0.00593522	0.00264558	0.00166774
292	2021-11-03	Technician 2	21100186	1241330	427514	505382	133712	6980500	530291	228510	66306	NQ	NQ	NQ	NQ	1030740	145709	77263	29589	21859	6849	1211100	144974	50057		0.732285	30.3744	-0.13532	0.0399527	6.0772	0.277595					12831685	0.0967394	0.0333171	0.0393855	0.0104205	0.544005	0.0413267	0.0178083	0.00516737	0.0803277	0.0113554	0.00602127	0.00230593	0.00170352
293	2021-11-05	Technician 2	21100218	1346280	463972	542426	143693	7587070	580871	251753	73578	NQ	NQ	NQ	NQ	1076680	201562	76322	41934	23396	7863	1286690	153742	53544		0.731957	30.356	-0.135514	0.042041	6.25631	0.275859					13911376	0.0967755	0.033352	0.0389915	0.0103292	0.545386	0.0417551	0.0180969	0.00528905	0.0773957	0.014489	0.0054863	0.00301437	0.00168179
294	2021-11-09	Technician 2	21110001	1485750	501781	575285	160012	8215710	643628	276012	87014	NQ	NQ	NQ	NQ	1202980	219284	79964	49952	27121		1446300	170533	60137		0.733195	30.4256	-0.13478	0.0471436	6.28917	0.282302					15201463	0.0977373	0.0330087	0.0378441	0.0105261	0.540455	0.0423399	0.0181569	0.00572405	0.0791358	0.0144252	0.00526028	0.003286	0.0017841
295	2021-11-15	Technician 2	21110052	1463870	497003	583319	160015	8412960	646009	276504	84991	NQ	NQ	NQ	NQ	1183970	200439	80720	46920	26898		1442840	165183	56903		0.736526	30.6128	-0.132812	0.0492698	6.34168	0.274851					15328544	0.0954996	0.0324234	0.0380544	0.010439	0.548843	0.0421442	0.0180385	0.00554462	0.0772396	0.0130762	0.00526599	0.00306096	0.00175477
297	2021-11-23	Technician 2	21110167	1861040	645861	769392	205420	10166100	790771	353106	100454	NQ	NQ	NQ	NQ	1482390	226955	105512	53144	31561	9172	1804460	212244	75332		0.732168	30.3679	-0.135389	0.0371927	6.39513	0.280707					18892914	0.0985047	0.0341854	0.0407238	0.0108729	0.538091	0.0418554	0.0186899	0.00531702	0.0784628	0.0120127	0.00558474	0.00281291	0.00167052
298	2021-11-29	Technician 2	21110221	1687500	586103	670302	191424	9646570	750700	315159	93091	NQ	NQ	NQ	NQ	1364460	232645	97330	46758	28500	9092	1647480	197286	65132		0.733411	30.4377	-0.134652	0.0467625	6.31536	0.274662					17629532	0.0957201	0.0332455	0.0380215	0.0108581	0.547182	0.042582	0.0178768	0.0052804	0.0773963	0.0131963	0.00552085	0.00265225	0.00161661
299	2021-12-03	Technician 2	21110290	1058940	356019	413448	113123	5924520	461921	202322	55537	NQ	NQ	NQ	NQ	829436	147441	61726	33411	19073	5777	1012730	121011	43803		0.735206	30.5386	-0.133591	0.0492142	6.47372	0.275021					10860238	0.0975062	0.0327819	0.0380699	0.0104163	0.545524	0.0425332	0.0186296	0.00511379	0.0763736	0.0135762	0.00568367	0.00307645	0.00175622
300	2021-12-13	Technician 2	21120004	1255430	419064	492294	136132	6970430	520533	234989	74072	NQ	NQ	NQ	NQ	975388	174255	74621	30411	19664	7476	1188910	138066	48687		0.732744	30.4002	-0.135048	0.0401546	6.38963	0.275276					12760422	0.0983847	0.0328409	0.0385798	0.0106683	0.546254	0.0407928	0.0184155	0.00580482	0.0764385	0.0136559	0.00584785	0.00238323	0.00154101
301	2021-12-15	Technician 2	21120054	1280880	438574	521658	144196	7314460	559275	248430	66788	NQ	NQ	NQ	NQ	1049250	163403	75059	37371	21843	6756	1262380	151241	52622		0.736387	30.6049	-0.132894	0.0450444	6.31055	0.276134					13394186	0.0956296	0.0327436	0.0389466	0.0107656	0.546092	0.0417551	0.0185476	0.00498634	0.0783362	0.0121995	0.00560385	0.00279009	0.00163078
302	2022-01-07	Technician 2	22010002	1587030	553329	646995	175852	8993780	697397	296105	82643	NQ	NQ	NQ	NQ	1298410	180801	89923	45416	28009	9547	1495830	179767	62062		0.733152	30.4231	-0.134806	0.0432393	5.90559	0.271615					16422896	0.0966352	0.0336925	0.0393959	0.0107077	0.547637	0.0424649	0.01803	0.00503218	0.079061	0.0110091	0.00547547	0.00276541	0.00170548
303	2022-01-28	Technician 2	22010013	1684850	558326	668326	178754	9214050	713104	306006	88277	NQ	NQ	NQ	NQ	1325020	204629	91849	54693	27153	9061	1596850	187488	61947		0.736453	30.6087	-0.132855	0.045374	6.25866	0.276469					16970383	0.0992818	0.0329	0.0393819	0.0105333	0.542949	0.0420205	0.0180318	0.00520183	0.0780784	0.012058	0.00541231	0.00322285	0.00160002
304	2022-02-22	Technician 2	22020002	1753450	586286	688452	185275	9562830	731248	329687	96969	NQ	NQ	NQ	NQ	1397870	248729	102151	49431	30352	9695	1675690	197876	67603		0.732444	30.3833	-0.135226	0.0411115	6.24889	0.281626					17713594	0.0989889	0.0330981	0.0388657	0.0104595	0.539858	0.0412817	0.0186121	0.00547427	0.0789151	0.0140417	0.00576681	0.00279057	0.00171349
305	2022-03-07	Technician 2	22030003	1689230	579303	664323	187936	9450430	716638	320291	95241	NQ	NQ	NQ	NQ	1337860	192562	91685	52478	32807	8976	1615820	195962	68046		0.730331	30.2646	-0.13648	0.0397843	6.36833	0.273726					17299588	0.0976457	0.0334865	0.0384011	0.0108636	0.546281	0.0414251	0.0185144	0.00550539	0.0773348	0.011131	0.00529984	0.00303348	0.0018964
306	2022-03-15	Technician 2	22030063	1661610	564565	675804	181606	9351120	710821	322634	90154	NQ	NQ	NQ	NQ	1385420	188133	96908	53679	30240	10319	1627840	196190	69450		0.735293	30.5435	-0.133539	0.0425181	6.10968	0.278758					17216493	0.0965127	0.0327921	0.0392533	0.0105484	0.543149	0.0412872	0.0187398	0.00523649	0.0804705	0.0109275	0.00562879	0.00311788	0.00175646
307	2022-03-22	Technician 2	22030088	1707820	576731	688194	188692	9497650	737360	320594	98125	NQ	NQ	NQ	NQ	1373540	238037	98572	55634	29675	9928	1647970	199514	69076		0.73677	30.6265	-0.132668	0.0455197	6.3104	0.279166					17537112	0.0973832	0.0328863	0.0392422	0.0107596	0.541574	0.0420457	0.0182809	0.00559528	0.0783219	0.0135733	0.00562077	0.00317236	0.00169213
308	2022-03-23	Technician 2	22030094	1685000	575108	677162	190986	9386990	735322	322545	94296	NQ	NQ	NQ	NQ	1356730	229161	93612	51857	29559	9222	1618220	193803	65847		0.736017	30.5841	-0.133112	0.0457175	6.22377	0.278365					17315420	0.0973121	0.0332136	0.0391075	0.0110298	0.542117	0.0424663	0.0186276	0.00544578	0.0783539	0.0132345	0.00540628	0.00299485	0.00170709
309	2022-04-01	Technician 2	22040001	1118940	381136	458976	124095	6152580	461072	213562	65767	NQ	NQ	NQ	NQ	871806	156687	67662	33300	19035	6650	1051450	130640	44046		0.732588	30.3915	-0.13514	0.0345897	6.39758	0.277175					11357404	0.0985208	0.0335584	0.0404121	0.0109264	0.541724	0.0405966	0.0188038	0.00579067	0.076761	0.013796	0.00595752	0.00293201	0.001676
310	2022-04-20	Technician 2	22040141	1969640	665229	786386	210803	10758000	819835	362437	110828	NQ	NQ	NQ	NQ	1522790	261057	107890	59758	34965	9594	1817880	220975	76137		0.732006	30.3587	-0.135485	0.0386204	6.27048	0.274725					19794204	0.0995059	0.0336073	0.0397281	0.0106497	0.543492	0.0414179	0.0183103	0.00559901	0.0769311	0.0131886	0.00545059	0.00301896	0.00176643
311	2022-05-12	Technician 2	22050002	2742620	925782	1113430	295778	15320900	1186260	511952	159952	NQ	NQ	NQ	NQ	2208110	366729	152023	86324	46938	13382	2654010	319849	108856		0.737087	30.6443	-0.132481	0.0459307	6.30405	0.278053					28212895	0.0972116	0.0328141	0.0394653	0.0104838	0.543046	0.0420467	0.018146	0.00566946	0.078266	0.0129986	0.00538842	0.00305974	0.00166371
312	2022-05-16	Technician 2	22050013	2953490	1001420	1188010	324429	16213300	1259525	567239	175346	NQ	NQ	NQ	NQ	2414520	370249	170362	98490	52782	13966	2978880	348560	114699		0.73461	30.5051	-0.133943	0.0424467	6.46596	0.286372					30245267	0.0976513	0.03311	0.0392792	0.0107266	0.536061	0.0416437	0.0187546	0.00579747	0.0798313	0.0122416	0.00563268	0.00325638	0.00174513
313	2022-05-16	Technician 2	22050007	3068080	1047840	1234940	329933	16731700	1321610	576403	166342	NQ	NQ	NQ	NQ	2427440	454458	173366	94295	51872	16946	2975890	345492	118338		0.733667	30.4521	-0.134501	0.0432773	6.42441	0.282893					31134945	0.0985414	0.0336548	0.0396641	0.0105969	0.537393	0.0424478	0.0185131	0.00534261	0.0779651	0.0145964	0.00556821	0.00302859	0.00166604
331	2022-06-01	Technician 2	22050039	3642160	1241820	1482310	372578	19966500	1544690	662202	200298	NQ	NQ	NQ	NQ	2808440	486120	194433	106134	58153	19664	3379180	396409	133986		0.732447	30.3835	-0.135224	0.0405248	6.2628	0.274018			85-150		36695077	0.0992547	0.0338416	0.0403953	0.0101534	0.544119	0.0420953	0.0180461	0.00545844	0.0765345	0.0132476	0.00529861	0.00289232	0.00158476
332	2022-06-01	Technician 2	22050040	3666450	1236160	1485720	376618	20090800	1580645	675737	203725	NQ	NQ	NQ	NQ	2817340	494869	190053	106161	62818	17198	3420900	405859	137814		0.735815	30.5728	-0.133231	0.0457837	6.37	0.274789			85-150		36968867	0.0991767	0.0334379	0.0401884	0.0101874	0.543452	0.0427561	0.0182785	0.00551072	0.0762084	0.0133861	0.00514089	0.00287163	0.00169921
333	2022-06-03	Technician 2	22060001	3611940	1209490	1486640	383686	19693900	1555698	697101	196149	NQ	NQ	NQ	NQ	2921350	547756	205673	116007	63407	20539	3506370	415634	137597		0.739082	30.7564	-0.131307	0.0462656	6.25317	0.285485			85-150		36768937	0.0982335	0.0328943	0.040432	0.0104351	0.535612	0.0423101	0.018959	0.00533464	0.0794516	0.0148972	0.00559366	0.00315503	0.00172447
334	2022-06-03	Technician 2	22060002	3696510	1233620	1454460	396050	19871100	1558960	661141	202517	NQ	NQ	NQ	NQ	2868790	511766	191537	112182	63164	17803	3477080	398807	137545		0.734311	30.4883	-0.13412	0.0435542	6.29886	0.279834			85-150		36853032	0.100304	0.033474	0.0394665	0.0107467	0.539199	0.0423021	0.0179399	0.00549526	0.0778441	0.0138867	0.00519732	0.00304404	0.00171394
335	2022-06-03	Technician 2	22060003	3635190	1238070	1464140	377011	19855800	1599660	670424	211322	NQ	NQ	NQ	NQ	2861320	520688	209349	92888	59997	18014	3399180	405248	134364		0.735392	30.549	-0.133481	0.04822	6.16919	0.278462			85-150		36752665	0.0989096	0.0336865	0.0398377	0.0102581	0.540255	0.043525	0.0182415	0.00574984	0.0778534	0.0141674	0.00569616	0.00252738	0.00163245
336	2022-06-03	Technician 2	22060004	3662780	1206120	1391280	365490	19968800	1585190	674760	196203	NQ	NQ	NQ	NQ	2808910	562373	190639	117964	60923	20451	3460110	399762	134533		0.734807	30.5161	-0.133827	0.0522857	6.45301	0.278353			85-150		36806288	0.0995151	0.0327694	0.0378001	0.0099301	0.542538	0.0430685	0.0183327	0.00533069	0.076316	0.0152793	0.00517952	0.003205	0.00165523
337	2022-06-10	Technician 2	22060006	3980880	1347490	1636120	426173	22115100	1746890	743937	225575	NQ	NQ	NQ	NQ	3126880	561395	213057	121732	65134	22695	3798430	440454	149548		0.73869	30.7344	-0.131538	0.0481051	6.33321	0.276606					40721490	0.0977587	0.0330904	0.0401783	0.0104656	0.543082	0.0428985	0.0182689	0.00553946	0.076787	0.0137862	0.00523205	0.00298938	0.0015995
338	2022-06-14	Technician 2	22060021	3579410	1218890	1419100	381787	19922900	1557700	638809	195546	NQ	NQ	NQ	NQ	2780810	497374	198233	113290	62985	18195	3359840	404699	134203		0.73372	30.4551	-0.13447	0.0461817	6.33949	0.272762					36483771	0.0981096	0.0334091	0.0388967	0.0104646	0.546076	0.0426957	0.0175094	0.00535981	0.0762205	0.0136327	0.00543346	0.00310522	0.00172638
339	2022-06-15	Technician 2	22060039	3423960	1157010	1390230	369055	18895500	1434240	613105	187617	NQ	NQ	NQ	NQ	2581400	549686	189800	100390	55121	19026	3239020	372330	130706		0.734053	30.4738	-0.134272	0.0394389	6.63491	0.275099					34708196	0.0986499	0.0333354	0.0400548	0.0106331	0.54441	0.0413228	0.0176646	0.00540555	0.0743744	0.0158374	0.00546845	0.0028924	0.00158813
340	2022-06-17	Technician 2	22060048	2984460	1007340	1202070	328251	17684900	1305670	566542	166381	NQ	NQ	NQ	NQ	2478220	451967	172283	88702	53257	16135	2989600	351218	120362		0.737899	30.6899	-0.132003	0.0482712	6.29566	0.273351					31967358	0.0933596	0.0315115	0.037603	0.0102683	0.553217	0.0408439	0.0177225	0.00520472	0.0775235	0.0141384	0.00538934	0.00277477	0.00166598
341	2022-06-20	Technician 2	22060081	3383030	1157490	1368700	370092	18750700	1421400	607950	197621	NQ	NQ	NQ	NQ	2673104	390310	178578	103529	55409	18118	3113790	366613	120646		0.731919	30.3538	-0.135537	0.0378726	5.94845	0.27135					34277080	0.0986966	0.0337686	0.0399305	0.0107971	0.547033	0.0414679	0.0177363	0.0057654	0.0779852	0.0113869	0.00520984	0.00302036	0.0016165
342	2022-06-24	Technician 2	22060086	1540480	507133	623878	169656	8303580	626910	272305	85600	NQ	NQ	NQ	NQ	1103270	244259	83526	41584	24082	6991	1356600	166699	54576		0.736906	30.6341	-0.132588	0.038258	6.54178	0.269412					15211129	0.101273	0.0333396	0.0410146	0.0111534	0.545888	0.0412139	0.0179017	0.00562746	0.0725304	0.0160579	0.00549111	0.00273379	0.00158318
345	2022-07-08	Technician 2	22070039	3699620	1245440	1483290	393492	19526000	1558360	638157	191671	NQ	NQ	NQ	NQ	2634770	496690	187714	102008	54987	16725	3141180	380875	134167		0.733913	30.4659	-0.134355	0.0414809	6.27261	0.266725					35885146	0.103096	0.0347063	0.0413344	0.0109653	0.544125	0.0434263	0.0177833	0.00534124	0.0734223	0.0138411	0.00523097	0.00284262	0.00153231
358	2022-07-26	Technician 2	22070139	2865380	960860	1116690	296224	15949300	1218300	540348	157213	NQ	NQ	NQ	NQ	2281030	335835	155576	75483	43086	12572	2727920	314444	99814		0.732506	30.3868	-0.135189	0.0447168	6.13011	0.274756			85-150		29150075	0.0982975	0.0329625	0.0383083	0.010162	0.547144	0.0417941	0.0185368	0.00539323	0.0782513	0.0115209	0.00533707	0.00258946	0.00147808
359	2022-07-27	Technician 2	22070146	3126360	1036910	1190700	320581	17146500	1279970	598978	172486	NQ	NQ	NQ	NQ	2497670	403120	164052	86556	49791	14617	3006050	344978	107650		0.729136	30.1975	-0.137191	0.0395669	6.17727	0.280309			85-150		31546969	0.0991018	0.0328688	0.0377437	0.010162	0.543523	0.0405735	0.0189869	0.00546759	0.0791731	0.0127784	0.00520025	0.00274372	0.00157831
362	2022-07-27	Technician 2	22070149	3603050	1160690	1367990	355271	19741500	1528530	682799	190234	NQ	NQ	NQ	NQ	2861470	422593	199196	92253	57965	15342	3407440	389100	131431		0.736953	30.6368	-0.13256	0.0521347	6.10821	0.277028			85-150		36206854	0.0995129	0.0320572	0.0377826	0.00981226	0.545242	0.0422166	0.0188583	0.00525409	0.0790312	0.0116716	0.00550161	0.00254794	0.00160094
363	2022-08-02	Technician 2	22080002	4085250	1307720	1541110	396054	22021100	1705920	743892	205740	NQ	NQ	NQ	NQ	3185530	396500	206426	107267	61406	16466	3743110	422988	144703		0.735857	30.5752	-0.133207	0.05027	5.9608	0.273132					40291182	0.101393	0.0324567	0.0382493	0.00982979	0.546549	0.0423398	0.0184629	0.00510633	0.0790627	0.00984086	0.00512335	0.00266229	0.00152406
365	2022-08-05	Technician 2	22080037	1498910	490393	570153	154987	7916190	610554	287172	78820	NQ	NQ	NQ	NQ	1189790	180635	75415	41977	24615		1426950	161461	56078		0.731451	30.3276	-0.135814	0.0409402	6.1719	0.285514					14764100	0.101524	0.0332152	0.0386175	0.0104976	0.536178	0.041354	0.0194507	0.00533863	0.0805867	0.0122347	0.005108	0.00284318	0.00166722
369	2022-08-18	Technician 2	22080221	2140440	699251	793703	202847	11527600	880482	399954	114929	NQ	NQ	NQ	NQ	1630040	292285	104300	57015	34716	10381	1919420	225779	72549		0.728581	30.1663	-0.137522	0.0440968	6.04816	0.274274					21105691	0.101415	0.0331309	0.0376061	0.00961101	0.546184	0.0417178	0.0189501	0.0054454	0.0772322	0.0138486	0.0049418	0.0027014	0.00164486
372	2022-09-02	Technician 2	22090002	1340500	449749	506078	143683	7294970	586725	258972	72590	NQ	NQ	NQ	NQ	1067840	178678	70398	36861	23155	7408	1289540	155696	49222		0.733282	30.4305	-0.134729	0.05099	6.30925	0.282174					13532065	0.099061	0.0332358	0.0373984	0.010618	0.539088	0.0433581	0.0191377	0.0053643	0.0789118	0.013204	0.00520231	0.00272397	0.00171112
375	2022-10-03	Technician 2	22100002	1684510	561083	634201	173446	9101060	677252	318352	91036	NQ	NQ	NQ	NQ	1355380	203801	94833	41270	26903	7768	1604690	178143	61965		0.725763	30.0079	-0.139205	0.0353791	6.0209	0.281929					16815693	0.100175	0.0333666	0.0377148	0.0103145	0.541224	0.040275	0.0189318	0.00541375	0.0806021	0.0121197	0.00563955	0.00245426	0.00159987
376	2022-10-05	Technician 2	22100007	1632460	529812	628057	154757	8598510	660721	313626	90158	NQ	NQ	NQ	NQ	1339710	213510	83201	48909	24488	6355	1592410	185411	62279		0.731516	30.3312	-0.135776	0.0412863	6.12432	0.292183					16164374	0.100991	0.0327765	0.0388544	0.00957396	0.531942	0.0408751	0.0194023	0.00557757	0.0828804	0.0132087	0.00514718	0.00302573	0.00151494
377	2022-10-05	Technician 2	22100013	1702040	564581	649235	173114	9384570	693273	338547	95208	NQ	NQ	NQ	NQ	1476750	191952	97443	50071	26001	8138	1700080	196593	68668		0.728593	30.1669	-0.137515	0.0385364	5.82636	0.288353					17416264	0.097727	0.0324169	0.0372775	0.00993979	0.538839	0.0398061	0.0194386	0.00546661	0.0847914	0.0110214	0.00559494	0.00287496	0.00149291
378	2022-10-10	Technician 2	22100012	1738130	565645	664531	172925	9170330	692034	334392	98542	NQ	NQ	NQ	NQ	1407940	231178	94551	49607	25941	7399	1664840	193569	63764		0.73002	30.2471	-0.136665	0.0374577	6.0694	0.289519					17175318	0.101199	0.0329336	0.038691	0.0100682	0.533925	0.0402924	0.0194693	0.00573742	0.0819746	0.0134599	0.00550505	0.00288827	0.00151037
381	2022-10-10	Technician 2	22100015	1627170	516522	591493	159145	8602312	641550	301670	89515	NQ	NQ	NQ	NQ	1270260	224698	90119	48080	27231	7053	1501920	174104	59638		0.729387	30.2115	-0.137042	0.0408664	6.09318	0.282565					15932480	0.102129	0.0324194	0.037125	0.00998871	0.539923	0.0402668	0.0189343	0.0056184	0.0797277	0.0141031	0.00565631	0.00301773	0.00170915
395	2022-10-26	Technician 2	22100116	1708730	527945	593368	153887	8289520	649365	303716	86644	NQ	NQ	NQ	NQ	1298760	146112	86760	44085	27213	7468	1461380	165632	56188		0.725681	30.0033	-0.139254	0.0395	5.55972	0.284531			80-150		15606773	0.109486	0.0338279	0.0380199	0.00986027	0.531149	0.0416079	0.0194605	0.00555169	0.0832177	0.00936209	0.00555912	0.00282474	0.00174367
396	2022-10-26	Technician 2	22100117	1626040	505558	562511	150798	7749230	602844	299797	86363	NQ	NQ	NQ	NQ	1247710	188218	87361	37559	21867	6040	1406460	160812	58000		0.722482	29.8235	-0.141173	0.0333501	5.64958	0.294098			80-150		14797168	0.109889	0.0341659	0.0380148	0.010191	0.523697	0.0407405	0.0202604	0.00583645	0.0843209	0.0127199	0.0059039	0.00253826	0.00147778
397	2022-10-26	Technician 2	22100118	1611800	519753	580217	150229	7946070	620416	306634	81483	NQ	NQ	NQ	NQ	1284300	203754	91027	45942	25109	5801	1487900	170489	58389		0.722149	29.8048	-0.141373	0.0336318	5.87676	0.297438			80-150		15189313	0.106114	0.0342183	0.038199	0.00989044	0.523136	0.0408456	0.0201875	0.0053645	0.0845529	0.0134143	0.00599283	0.00302463	0.00165307
412	2022-11-22	Technician 2	22110081	711863	223610	263873	66550	3497630	265709	123737	34944	NQ	NQ	NQ	NQ	505584	82459	39024	15523	10402	4804	593084	71258	22654		0.727219	30.0897	-0.138335	0.0318068	6.04388	0.276966					6532708	0.108969	0.0342293	0.0403926	0.0101872	0.535403	0.0406736	0.0189411	0.00534908	0.0773927	0.0126225	0.00597363	0.0023762	0.0015923
414	2022-11-30	Technician 2	22110135	864922	277949	322535	80263	4248280	322972	159182	46747	NQ	NQ	NQ	NQ	656147	116288	49490	23762	13048	4095	784775	94793	33759		0.723081	29.8571	-0.140813	0.0278133	6.29733	0.293298					8099007	0.106794	0.0343189	0.039824	0.00991023	0.524543	0.039878	0.0196545	0.00577194	0.0810157	0.0143583	0.00611063	0.00293394	0.00161106
416	2022-12-05	Technician 2	22110164	850725	275550	316419	81475	4215510	336237	161116	43987	NQ	NQ	NQ	NQ	646921	104922	44190	25098	13261	5176	765412	90322	31747		0.727092	30.0826	-0.138411	0.0374721	6.14422	0.290063					8008068	0.106233	0.034409	0.0395125	0.0101741	0.526408	0.0419873	0.0201192	0.00549284	0.0807837	0.013102	0.00551818	0.00313409	0.00165595
417	2022-12-06	Technician 2	22120003	2765720	899376	1020380	273724	14408200	1122070	489633	143407	NQ	NQ	NQ	NQ	2138660	295642	143253	69467	44845	10152	2488990	286846	93908		0.72874	30.1752	-0.137427	0.0419945	5.88967	0.27831					26694273	0.103607	0.0336917	0.0382247	0.010254	0.539749	0.0420341	0.0183422	0.0053722	0.0801168	0.0110751	0.00536643	0.00260232	0.00167995
418	2022-12-06	Technician 2	22120011	2936390	978355	1114500	284604	15539100	1184320	511943	139421	NQ	NQ	NQ	NQ	2352300	279860	153701	78995	45381	12082	2681410	305348	100546		0.725318	29.9829	-0.139471	0.0360827	5.66026	0.277387					28698256	0.102319	0.0340911	0.0388351	0.00991712	0.541465	0.041268	0.0178388	0.00485817	0.0819667	0.00975181	0.00535576	0.00275261	0.00158132
420	2022-12-09	Technician 2	22120045	2834950	899391	1032520	278963	14877000	1094720	502378	142616	NQ	NQ	NQ	NQ	2181240	328219	142069	73807	43867	10799	2585030	293681	93835		0.727918	30.129	-0.137917	0.0367683	6.02187	0.278393					27415085	0.103408	0.0328064	0.0376625	0.0101755	0.542657	0.0399313	0.0183249	0.0052021	0.0795635	0.0119722	0.00518215	0.0026922	0.0016001
421	2022-12-12	Technician 2	22120073	3024740	983913	1109440	295585	15799600	1188330	541227	140728	NQ	NQ	NQ	NQ	2354430	349636	152450	75944	45082	13688	2742350	311478	106540		0.724954	29.9624	-0.13969	0.0356571	5.89537	0.279477					29235161	0.103462	0.0336551	0.0379488	0.0101106	0.540431	0.0406473	0.0185129	0.00481366	0.0805342	0.0119594	0.00521461	0.00259769	0.00154205
422	2022-12-16	Technician 2	22120105	1487460	474666	542142	142149	7478750	573205	248182	73891	NQ	NQ	NQ	NQ	1061180	163330	73349	36646	22905	7870	1264470	141688	49717		0.725969	30.0195	-0.139082	0.0354393	6.10507	0.273188					13841600	0.107463	0.0342927	0.0391676	0.0102697	0.54031	0.0414118	0.0179302	0.00533833	0.076666	0.0117999	0.00529917	0.00264753	0.00165479
423	2022-12-16	Technician 2	22120106	1297440	419104	484884	119896	6614170	506945	231173	67491	NQ	NQ	NQ	NQ	994703	158534	71922	35698	18849	7006	1142250	137358	47554		0.726224	30.0338	-0.138929	0.0357466	5.89187	0.281718					12354977	0.105014	0.0339219	0.039246	0.00970427	0.535345	0.0410316	0.0187109	0.00546266	0.0805103	0.0128316	0.0058213	0.00288936	0.00152562
426	2023-01-04	Technician 2	22120253	1849050	582229	681765	172393	9495400	713229	344864	92525	NQ	NQ	NQ	NQ	1474120	213741	99535	50275	28700	9442	1683350	196766	64354		0.729147	30.1981	-0.137185	0.0379048	5.74562	0.286275					17751738	0.104162	0.0327984	0.0384055	0.00971133	0.5349	0.040178	0.0194271	0.00521217	0.0830409	0.0120406	0.00560706	0.00283212	0.00161674
427	2023-01-10	Technician 2	23010005	4529470	1458720	1700140	448088	23523000	1772020	791787	225635	NQ	NQ	NQ	NQ	3437510	558383	236751	108086	72225	16172	4037940	449762	151529		0.72881	30.1791	-0.137385	0.0361737	5.94029	0.277865					43517218	0.104085	0.0335205	0.0390682	0.0102968	0.540545	0.04072	0.0181948	0.00518496	0.078992	0.0128313	0.0054404	0.00248375	0.00165969
428	2023-01-27	Technician 2	23010034	4593820	1528900	1767710	442377	24736000	1875320	830702	230397	NQ	NQ	NQ	NQ	3651890	509959	240061	118859	72524	19530	4275580	470146	160555		0.727678	30.1155	-0.138061	0.0384814	5.88158	0.277455					45524330	0.100909	0.0335842	0.03883	0.00971738	0.543358	0.0411938	0.0182474	0.00506096	0.0802184	0.0112019	0.00527325	0.00261089	0.00159308
438	2023-04-26	Technician 2	23040051	3354700	1075410	1238450	317804	16736900	1288240	590801	165257	NQ	NQ	NQ	NQ	2612680	381257	172517	91126	51864	14248	2950356	339149	113457		0.725654	30.0018	-0.13927	0.0337746	5.62181	0.285885					31494216	0.106518	0.0341463	0.0393231	0.0100909	0.531428	0.040904	0.018759	0.00524722	0.0829575	0.0121056	0.00547774	0.00289342	0.00164678
439	2023-05-15	Technician 2	23050017	2605190	824340	952524	254924	12872900	1009490	445887	130980	NQ	NQ	NQ	NQ	1880710	287664	131095	57817	37331	10533	2202650	244968	84645		0.728949	30.187	-0.137303	0.0378752	5.92477	0.277647					24033648	0.108398	0.0342994	0.0396329	0.010607	0.53562	0.0420032	0.0185526	0.00544986	0.0782532	0.0119692	0.00545464	0.00240567	0.00155328
441	2023-06-07	Technician 2	23060001	3003846	962997	1106480	278442	15082900	1123310	502331	138131	NQ	NQ	NQ	NQ	2182920	341356	135924	73103	41398	12500	2486610	275391	96151		0.722578	29.8289	-0.141116	0.0286846	5.66339	0.272561					27843790	0.107882	0.0345857	0.0397388	0.0100001	0.541697	0.0403433	0.018041	0.00496093	0.0783988	0.0122597	0.00488166	0.00262547	0.00148679
444	2023-08-16	Technician 2	23080002	3219010	1039340	1188780	300935	15660000	1243330	518037	146564	NQ	NQ	NQ	NQ	2190080	359234	150763	76703	45670	13769	2623280	296431	101161		0.724487	29.9362	-0.139969	0.0336885	6.15482	0.271533					29173087	0.110342	0.0356267	0.0407492	0.0103155	0.536796	0.0426191	0.0177574	0.00502395	0.0750719	0.0123139	0.00516788	0.00262924	0.00156548
448	2023-10-16	Technician 2	23100027	3195820	1048400	1196510	301423	16680200	1258670	585290	171119	NQ	NQ	NQ	NQ	2474820	436352	161944	76358	48034	11563	2895030	323003	110128		0.724468	29.9351	-0.139981	0.034459	5.91951	0.28235					30974664	0.103175	0.033847	0.0386287	0.00973128	0.538511	0.0406355	0.0188958	0.00552448	0.0798982	0.0140874	0.00522827	0.00246518	0.00155075
449	2023-10-20	Technician 2	23100080	3078950	975840	1140640	303380	15705800	1145950	562544	157158	NQ	NQ	NQ	NQ	2299170	354334	147341	79030	46216	14465	2719020	306965	101405		0.726334	30.04	-0.138863	0.0295045	6.01757	0.279485					29138208	0.105667	0.03349	0.0391459	0.0104118	0.53901	0.0393281	0.0193061	0.00539354	0.0789057	0.0121605	0.00505663	0.00271225	0.0015861
401	2023-10-28	Technician 2	22100126	2315400	714636	812144	220902	11479600	864158	429935	117596	NQ	NQ	NQ	NQ	1828680	309685	120421	64786	34379	10634	2094090	240322	80334		0.726386	30.0429	-0.138833	0.0356516	5.76245	0.29398					21737702	0.106515	0.0328754	0.0373611	0.0101622	0.528096	0.0397539	0.0197783	0.00540977	0.0841248	0.0142464	0.00553973	0.00298035	0.00158154
451	2023-10-31	Technician 2	23100190	3516512	1142660	1311040	328203	17932000	1395190	613484	161118	NQ	NQ	NQ	NQ	2669860	366781	173511	87349	54890	12000	3135000	342528	115782		0.726446	30.0463	-0.138797	0.0377356	5.89029	0.27921					33357908	0.105418	0.0342545	0.0393022	0.00983884	0.537564	0.0418249	0.018391	0.00482998	0.0800368	0.0109953	0.0052015	0.00261854	0.00164549
477	2023-11-21	Technician 2	23110086	1309770	407668	462924	123718	6273380	490482	230601	66336	NQ	NQ	NQ	NQ	973587	145651	66639	31412	18461	6126	1120150	126184	44443	4797960	0.725438	29.9896	-0.1394	0.0347439	5.79418	0.287901	1.30751	0.0480623			11897532	0.110088	0.0342649	0.0389092	0.0103986	0.527284	0.0412255	0.0193823	0.00557561	0.081831	0.0122421	0.00560108	0.00264021	0.00155167
480	2023-11-24	Technician 2	23110106	1268700	404012	452889	121799	6111350	454570	234019	72205	NQ	NQ	NQ	NQ	933761	146753	70603	30362	20324	6300	1126510	124924	42258	4954700	0.718119	29.5783	-0.143804	0.0218747	6.18958	0.291405	1.23345	0.0472317			11621339	0.10917	0.0347647	0.0389705	0.0104806	0.525873	0.0391151	0.020137	0.00621314	0.0803488	0.0126279	0.00607529	0.00261261	0.00174885
495	2023-11-29	Technician 2	23110136	3008970	959118	1103450	287697	16130500	1183910	595938	181986	NQ	NQ	NQ	NQ	2412980	432278	169327	72904	45492	12957	2918550	332382	107543	12368400	0.728616	30.1682	-0.137501	0.03967	6.2368	0.288535	1.30417	0.0481823	75-150		29955982	0.100446	0.0320176	0.0368357	0.00960399	0.538473	0.0395217	0.0198938	0.00607511	0.0805509	0.0144304	0.00565253	0.0024337	0.00151863
496	2023-11-29	Technician 2	23110137	2970970	951733	1128660	282331	15948800	1179250	593082	177617	NQ	NQ	NQ	NQ	2442800	401909	165496	78002	48908	12300	2910260	321917	111249	12466500	0.731299	30.319	-0.135905	0.0399272	6.07769	0.290359	1.27933	0.0475741	75-150		29725284	0.0999476	0.0320176	0.0379697	0.00949801	0.53654	0.0396716	0.0199521	0.00597528	0.0821792	0.0135208	0.00556752	0.0026241	0.00164533
497	2023-11-29	Technician 2	23110138	6072390	1965570	2259610	591568	32251300	2350420	1170530	357048	NQ	NQ	NQ	NQ	4898510	789643	320454	161698	94599	29136	5823560	646180	215126		0.725754	30.0074	-0.139211	0.0333829	6.04098	0.287903			75-150		59997342	0.101211	0.032761	0.0376618	0.0098599	0.537545	0.0391754	0.0195097	0.00595106	0.0816455	0.0131613	0.00534114	0.00269509	0.00157672
506	2023-12-04	Technician 2	23120001	4433260	1358220	1574940	411273	21818900	1608360	743131	216418	NQ	NQ	NQ	NQ	3182320	473435	204287	107385	63364	18737	3710310	409916	138431	9279720	0.725767	30.0081	-0.139203	0.0313248	5.85477	0.27619	2.35125	0.0800812			40472687	0.109537	0.0335589	0.0389137	0.0101617	0.539102	0.0397394	0.0183613	0.00534726	0.0786288	0.0116976	0.00504753	0.00265327	0.0015656
507	2023-12-04	Technician 2	23120002	3741710	1253250	1421240	372093	19926504	1526870	734158	221741	NQ	NQ	NQ	NQ	3058790	491505	210203	97474	62356	17972	3576740	401920	131732	9064530	0.725973	30.0197	-0.13908	0.0373516	5.90644	0.288579	2.19829	0.0809924			37246258	0.100459	0.0336477	0.0381579	0.00999008	0.534993	0.0409939	0.0197109	0.00595338	0.0821234	0.0131961	0.0056436	0.00261701	0.00167415
511	2023-12-05	Technician 2	23120006	4117380	1337350	1533460	398906	21903100	1652050	798431	258052	NQ	NQ	NQ	NQ	3364640	573220	319671	98663	64507	18993	3943330	433885	145411	9885800	0.728278	30.1492	-0.137703	0.0399084	5.91656	0.289801	2.21561	0.0807654			40961049	0.100519	0.0326493	0.037437	0.00973867	0.53473	0.0403322	0.0194924	0.00629994	0.0821424	0.0139943	0.00780427	0.0024087	0.00157484
513	2023-12-06	Technician 2	23120015	4463730	1399290	1650340	419526	23191500	1782290	866383	259790	NQ	NQ	NQ	NQ	3582340	512203	238229	118033	70529	19937	4246220	467741	157843	10320900	0.733542	30.4451	-0.134575	0.04548	6.00291	0.289877	2.24704	0.0839445			43445924	0.102742	0.0322076	0.0379861	0.00965628	0.533802	0.0410232	0.0199416	0.00597962	0.0824551	0.0117894	0.00548335	0.00271678	0.00162337
516	2023-12-12	Technician 2	23120030	3295710	1061170	1209620	306441	17381300	1265830	619134	188318	NQ	NQ	NQ	NQ	2587450	378202	169441	89948	50005	16142	2998970	344938	115928	7815590	0.723874	29.9017	-0.140337	0.0331868	5.87386	0.280378	2.22393	0.0792178			32078547	0.102739	0.0330804	0.0377081	0.00955283	0.541836	0.0394603	0.0193006	0.00587053	0.0806598	0.0117899	0.00528207	0.00280399	0.00155883
518	2023-12-19	Technician 2	23120071	3116440	957666	1131400	314791	16337600	1173860	620897	185620	NQ	NQ	NQ	NQ	2557630	365863	174343	90765	48955	13973	3004890	341066	112760	7806000	0.732325	30.3767	-0.135296	0.0374011	5.96575	0.291902	2.09295	0.079541			30548519	0.102016	0.031349	0.0370362	0.0103046	0.534808	0.0384261	0.0203249	0.00607624	0.0837235	0.0119765	0.00570709	0.00297118	0.00160253
519	2023-12-19	Technician 2	23120100	3481720	1139290	1306630	339304	18538200	1372341	677170	204752	NQ	NQ	NQ	NQ	2840680	433847	183811	100124	51987	14812	3304570	370357	124068	8265160	0.725972	30.0196	-0.13908	0.0348987	5.86072	0.286971	2.24293	0.0819307			34483663	0.100967	0.0330385	0.0378913	0.00983956	0.537594	0.0397968	0.0196374	0.00593765	0.0823776	0.0125812	0.00533038	0.00290352	0.00150758
523	2024-01-24	Technician 2	24010088	3980770	1192020	1377660	360959	19226700	1433880	659700	185358	NQ	NQ	NQ	NQ	2886680	414652	200779	88828	53147	16423	3332110	384275	122271	8826430	0.726884	30.0709	-0.138535	0.0344392	5.80125	0.280039	2.17831	0.0747414			35916212	0.110835	0.0331889	0.0383576	0.01005	0.535321	0.0399229	0.0183677	0.00516084	0.0803726	0.011545	0.00559021	0.0024732	0.00147975
541	2024-02-02	Technician 2	24020002	8190140	2793970	3250050	890447	46218100	3597621	1643360	475381	NQ	NQ	NQ	NQ	7134660	1102870	470556	231561	136462	42754	8250290	952726	312225	17847000	0.734718	30.5112	-0.133879	0.0476223	5.84222	0.287029	2.58968	0.0920805	85-150		85693173	0.0955752	0.0326043	0.0379266	0.0103911	0.539344	0.0419826	0.0191773	0.00554748	0.0832582	0.01287	0.00549117	0.00270221	0.00159245
543	2024-02-02	Technician 2	24020004	8453480	2846450	3302030	856438	45897500	3639810	1578180	466154	NQ	NQ	NQ	NQ	6747050	948791	455391	224095	136192	39428	7851720	899852	293659	17241200	0.732595	30.3919	-0.135136	0.0465957	5.88219	0.277084	2.66208	0.0915354	85-150		84636220	0.0998802	0.0336316	0.0390144	0.010119	0.542291	0.0430053	0.0186466	0.00550774	0.0797182	0.0112102	0.00538057	0.00264774	0.00160915
544	2024-02-02	Technician 2	24020005	8326010	2800280	3315970	882393	45653700	3622790	1579220	454168	NQ	NQ	NQ	NQ	6752480	1006790	467051	217776	134831	38630	7774490	900401	302870	17305600	0.736356	30.6032	-0.132912	0.0482569	5.82309	0.27787	2.63809	0.0912549	85-150		84229850	0.0988487	0.0332457	0.0393681	0.010476	0.542013	0.0430108	0.0187489	0.00539201	0.0801673	0.0119529	0.00554496	0.0025855	0.00160075
546	2024-02-02	Technician 2	24020008	9165760	3211200	3683890	969406	50722400	4078170	1753040	510599	NQ	NQ	NQ	NQ	7456970	1168970	493668	237152	147299	41922	8702210	1007220	335093	18348100	0.731115	30.3087	-0.136014	0.0454163	5.94152	0.278632	2.76445	0.0955434	vanaf hier 85-150		93684969	0.097836	0.0342766	0.0393221	0.0103475	0.541414	0.0435307	0.0187121	0.00545017	0.0795962	0.0124777	0.00526945	0.00253138	0.00157228
547	2024-02-05	Technician 2	24020019	3570030	1144280	1334620	360029	18784400	1435020	670877	194323	NQ	NQ	NQ	NQ	2870260	402355	194323	92013	55903	19087	3335560	377675	126542	7393380	0.732266	30.3734	-0.135331	0.0423439	5.86089	0.284616	2.54071	0.0907402			34967297	0.102096	0.0327243	0.0381677	0.0102962	0.537199	0.0410389	0.0191858	0.00555728	0.0820841	0.0115066	0.00555728	0.0026314	0.00159872
548	2024-02-07	Technician 2	24020056	3917160	1300380	1498620	393510	20234800	1625902	721451	215941	NQ	NQ	NQ	NQ	3010300	454210	200462	100448	59319	15139	3487590	399502	135971	7781560	0.730123	30.2529	-0.136604	0.0421675	5.87093	0.280522	2.60035	0.0927129			37770705	0.103709	0.0344283	0.0396768	0.0104184	0.535727	0.0430466	0.0191008	0.00571716	0.0796993	0.0120255	0.00530734	0.00265942	0.0015705
549	2024-02-09	Technician 2	24020086	3836640	1296270	1506570	404841	20324600	1624810	734917	210420	NQ	NQ	NQ	NQ	3053840	463270	219054	88507	60588	19106	3492820	402429	136053	7687250	0.731759	30.3449	-0.135632	0.0423482	5.76144	0.281305	2.64394	0.0956021			37874735	0.101298	0.0342252	0.0397777	0.0106889	0.536627	0.0428996	0.0194039	0.00555568	0.08063	0.0122316	0.00578364	0.00233683	0.00159969
550	2024-02-12	Technician 2	24020102	3795120	1308510	1501440	406048	20787900	1638480	738064	208095	NQ	NQ	NQ	NQ	3001760	521364	199415	107870	59242	18020	3523030	402631	131156	7635100	0.730453	30.2715	-0.136408	0.042419	5.97294	0.277702	2.72268	0.0966672			38348145	0.0989649	0.0341219	0.0391529	0.0105885	0.542084	0.0427264	0.0192464	0.00542647	0.0782765	0.0135955	0.00520012	0.00281291	0.00154485
551	2024-02-13	Technician 2	24020138	4438800	1510380	1731370	466418	23843500	1919450	871016	241325	NQ	NQ	NQ	NQ	3612260	553200	241093	120725	72209	19661	4100270	477207	156878	9127980	0.731613	30.3366	-0.135719	0.0454466	5.69475	0.282289	2.61213	0.0954226			44375762	0.100028	0.0340361	0.0390161	0.0105106	0.537309	0.0432545	0.0196282	0.00543822	0.0814016	0.0124663	0.00543299	0.00272052	0.00162722
552	2024-02-19	Technician 2	24020173	4728220	1580210	1866680	485604	25140900	1978870	921165	273387	NQ	NQ	NQ	NQ	3806820	515712	253137	128870	72389	23089	4329290	507778	165023	9500110	0.732683	30.3968	-0.135084	0.0419356	5.71356	0.281427	2.64638	0.0969636			46777144	0.10108	0.0337817	0.0399058	0.0103812	0.537461	0.0423042	0.0196926	0.00584446	0.0813821	0.0110249	0.00541155	0.00275498	0.00154753
553	2024-02-19	Technician 2	24020195	4745470	1587060	1879500	498113	25594500	2063550	891593	270678	NQ	NQ	NQ	NQ	3800960	609103	253996	139309	77681	22193	4407790	503086	169801	9887480	0.736728	30.6241	-0.132693	0.0492893	5.87241	0.280541	2.58858	0.0901739			47514383	0.0998744	0.0334017	0.0395564	0.0104834	0.538668	0.04343	0.0187647	0.00569676	0.079996	0.0128193	0.00534567	0.00293193	0.00163489
554	2024-02-20	Technician 2	24020216	5261900	1771490	2087800	547723	28922700	2245370	1058840	297509	NQ	NQ	NQ	NQ	4250410	731401	295380	138589	88540	24847	5055970	573720	196429	10924000	0.733706	30.4543	-0.134478	0.044355	6.10891	0.282615	2.64763	0.0969279			53548618	0.098264	0.0330819	0.0389889	0.0102285	0.54012	0.0419314	0.0197734	0.00555587	0.0793748	0.0136586	0.00551611	0.0025881	0.00165345
175	2019-05-08	Other	19080015	2.81921e+06	953311	1133883	320390	14713750	1.21147e+06	516730	162276	NQ	NQ	NQ	NQ	2.15586e+06	270602	80746.1	71183.7	42625.6	14021.6	2475571	299190	101121		0.736586	30.6161	-0.132777	0.0442369	5.8618	0.274999					2.73419e+07	0.103109	0.0348663	0.0414705	0.0117179	0.538139	0.0443082	0.0188988	0.00593505	0.078848	0.00989695	0.0029532	0.00260346	0.00155898
174	2019-07-30	Other	19070087	1671350	578186	680718	190313	8781910	714159	311754	97846.1	NQ	NQ	NQ	NQ	1267630	177300	95745.4	41894.3	26400.1	7653.03	1474560	178719	60934		0.732739	30.3999	-0.135051	0.0389479	6.01658	0.274882					1.63571e+07	0.102179	0.0353478	0.0416161	0.0116349	0.536888	0.0436606	0.0190593	0.00598188	0.0774974	0.0108393	0.00585346	0.00256123	0.00161399
364	2022-08-05	Technician 3	22080032	3663578	1215140	1387510	376869	19871228	1502660	697009	202700	NQ	NQ	NQ	NQ	2894210	346053	192831	103827	58461	16866	3538079	211449	127492		0.728895	30.1839	-0.137335	0.0400082	5.69056	0.278702					36405962	0.100631	0.0333775	0.0381122	0.0103518	0.545823	0.0412751	0.0191455	0.00556777	0.0794982	0.00950539	0.00529669	0.00285192	0.00160581
366	2022-08-11	Technician 3	22080191	1682780	569912	641921	181362	9131002	715389	316696	89783	NQ	NQ	NQ	NQ	1314130	189283	93143	37398	25390		1605240	183085	62499		0.729718	30.2302	-0.136845	0.0431341	6.34209	0.277961					16839013	0.0999334	0.0338447	0.0381211	0.0107703	0.542253	0.042484	0.0188073	0.00533184	0.0780408	0.0112407	0.00553138	0.00222091	0.00150781
367	2022-08-15	Technician 3	22080212	1474660	491685	553811	159862	8074280	623760	291440	80663	NQ	NQ	NQ	NQ	1177560	154668	87053	39192	22133		1445910	168196	54622		0.73119	30.3129	-0.13597	0.045156	6.39819	0.280657					14899495	0.0989738	0.0330001	0.0371698	0.0107294	0.541916	0.0418645	0.0195604	0.00541381	0.0790336	0.0103808	0.00584268	0.00263042	0.00148549
371	2022-09-01	Technician 3	22090001	1383190	472125	516075	134163	7303720	556683	258972	72590	NQ	NQ	NQ	NQ	1079790	155023	70398	36861	23155	7408	1318640	158606	49110		0.718814	29.6173	-0.143384	0.0315455	6.385	0.283157					13596509	0.101731	0.034724	0.0379564	0.00986746	0.537176	0.0409431	0.0190469	0.00533887	0.0794167	0.0114017	0.00517765	0.00271106	0.00170301
373	2022-09-06	Technician 3	22090055	1235390	416938	437721	129203	6373650	510440	233421	73129	NQ	NQ	NQ	NQ	1013900	136241	67647	26548	20179	4629	1179406	139134	47641		0.720981	29.7392	-0.142076	0.0394283	5.95062	0.292583					12045217	0.102563	0.0346144	0.0363398	0.0107265	0.529144	0.042377	0.0193787	0.00607121	0.0841745	0.0113108	0.00561609	0.00220403	0.00167527
382	2022-10-17	Technician 3	22100065	1642910	531200	604209	160292	8809701	696787	327282	106587	NQ	NQ	NQ	NQ	1397721	205375	98647	47448	27699	8785	1662054	194336	62343		0.733399	30.437	-0.13466	0.052231	6.1126	0.295715					16583376	0.0990697	0.0320321	0.0364346	0.00966582	0.531237	0.0420172	0.0197355	0.00642734	0.0842845	0.0123844	0.00594855	0.00286118	0.00167029
383	2022-10-17	Technician 3	22100083	2063987	685357	762517	207351	10846404	848263	407731	114370	NQ	NQ	NQ	NQ	1741942	227755	123946	57877	33282	10509	2073812	238186	82749		0.726239	30.0346	-0.13892	0.0407681	6.12508	0.296237					20526038	0.100555	0.0333896	0.0371488	0.0101019	0.528422	0.0413262	0.0198641	0.00557195	0.084865	0.0110959	0.00603848	0.00281969	0.00162145
415	2022-12-01	Technician 3	22110146	1209620	316600	361417	92027	4771502	362804	177702	52078.8	NQ	NQ	NQ	NQ	727300	103371	57311.8	19880.5	15305.6	3970	867158	103593	32472		0.720527	29.7136	-0.142349	0.0253066	6.16437	0.287741					9.27411e+06	0.13043	0.034138	0.0389705	0.009923	0.514497	0.0391201	0.019161	0.0056155	0.0784226	0.0111462	0.00617976	0.00214366	0.00165036
429	2023-01-30	Technician 3	23010066	5819531	1956573	2124689	598704	30293986	2340757	1049872	340152	NQ	NQ	NQ	NQ	4408251	576953	307011	136274	86943	24221	5229773	594566	199198		0.721315	29.7579	-0.141875	0.0342639	6.05868	0.276976					56087454	0.103758	0.0348843	0.0378817	0.0106745	0.540121	0.0417341	0.0187185	0.00606467	0.078596	0.0102867	0.00547379	0.00242967	0.00155013
431	2023-03-07	Technician 3	23030005	2487448	799236	981369	253237	12664780	987085	444999	142700	NQ	NQ	NQ	NQ	1885897	227040	126589	60604	36413	11894	2237995	254950	81813		0.735434	30.5514	-0.133457	0.0383664	6.036	0.28055					23684049	0.105026	0.0337458	0.0414359	0.0106923	0.534739	0.0416772	0.018789	0.00602515	0.0796273	0.0095862	0.00534491	0.00255885	0.00153745
433	2023-03-08	Technician 3	23030006	2566680	824009	940100	261549	13172440	1052578	459470	143981	NQ	NQ	NQ	NQ	1868806	290035	123543	69118	36285	11997	2277655	258977	85803		0.732311	30.3759	-0.135304	0.0464315	6.30951	0.276732					24443026	0.105007	0.0337114	0.0384609	0.0107004	0.538904	0.0430625	0.0187976	0.00589047	0.0764556	0.0118658	0.00505433	0.00282772	0.00148447
434	2023-03-10	Technician 3	23030031	2151877	698930	804500	208659	10980784	864658	398655	130743	NQ	NQ	NQ	NQ	1666720	210447	112892	55534	31366	9693	1951293	227888	74429		0.728755	30.176	-0.137419	0.0401269	5.97106	0.28411					20579068	0.104566	0.0339632	0.0390931	0.0101394	0.53359	0.0420164	0.0193719	0.0063532	0.080991	0.0102263	0.00548577	0.00269857	0.00152417
435	2023-03-13	Technician 3	23030061	2417577	781805	902077	229324	12089605	963552	425652	137696	NQ	NQ	NQ	NQ	1782282	217915	125136	55440	33963	10259	2124031	243605	80246		0.728234	30.1468	-0.137729	0.0394125	6.10387	0.279402					22620165	0.106877	0.0345623	0.0398793	0.010138	0.534461	0.042597	0.0188174	0.00608731	0.0787917	0.00963366	0.00553206	0.00245091	0.00150145
436	2023-04-03	Technician 3	23040001	2757011	924624	1005765	269670	13993532	1120363	488307	143990	NQ	NQ	NQ	NQ	2119261	282018	143533	70677	40021	10929	2492738	285409	94762		0.721534	29.7702	-0.141743	0.0370159	5.9818	0.283113					26242610	0.105059	0.0352337	0.0383256	0.010276	0.533237	0.0426925	0.0186074	0.00548688	0.0807565	0.0107466	0.00546946	0.00269322	0.00152504
440	2023-05-22	Technician 3	23050045	2826090	898920	1003183	267364	13756763	1104677	463883	142849	NQ	NQ	NQ	NQ	1996514	261358	136512	67992	39354	10011	2333729	269479	89360		0.725449	29.9902	-0.139393	0.0393515	5.9413	0.274245					25668038	0.110102	0.035021	0.039083	0.0104162	0.535949	0.0430371	0.0180724	0.00556525	0.0777821	0.0101822	0.00531837	0.0026489	0.00153319
442	2023-06-12	Technician 3	23060043	2728540	897345	1009368	270508	13586611	1059684	466147	143043	NQ	NQ	NQ	NQ	1979428	259641	135667	68223	38281	11995	2335024	268250	89122		0.722777	29.8401	-0.140996	0.0312317	6.0191	0.276149					25346877	0.107648	0.0354026	0.0398222	0.0106722	0.536027	0.0418073	0.0183907	0.00564342	0.0780936	0.0102435	0.00535241	0.00269157	0.00151028
443	2023-06-19	Technician 3	23060067	2790000	899939	1037452	269891	14114367	1131148	474917	152966	NQ	NQ	NQ	NQ	2018910	244688	137545	66065	39871	10344	2390295	274160	90757		0.73043	30.2702	-0.136421	0.0432633	6.044	0.272311					26143315	0.106719	0.0344233	0.0396833	0.0103235	0.539884	0.0432672	0.0181659	0.00585106	0.0772247	0.00935949	0.00526119	0.00252703	0.00152509
445	2023-09-22	Technician 3	23090002	2.74712e+06	927114	983784	275059	15141126	1.14193e+06	476427	141134	NQ	NQ	NQ	NQ	2.06283e+06	264950	129134	75562.6	38138.7	12519.9	2418781	279306	85604.6		0.721411	29.7633	-0.141817	0.0407102	5.92393	0.261598					2.72005e+07	0.100995	0.0340844	0.0361678	0.0101123	0.556648	0.0419821	0.0175154	0.00518863	0.0758379	0.00974061	0.00474747	0.00277798	0.00140213
446	2023-09-28	Technician 3	23090021	2.81557e+06	935155	1.08897e+06	280319	15073478	1.11826e+06	490693	137892	NQ	NQ	NQ	NQ	2.09107e+06	379827	149883	67005	40632.1	13451.7	2545556	282894	90266.7		0.726779	30.065	-0.138598	0.0332059	6.24089	0.272463					2.76009e+07	0.10201	0.0338813	0.0394541	0.0101561	0.546122	0.0405154	0.0177782	0.00499593	0.0757607	0.0137614	0.00543036	0.00242764	0.00147213
447	2023-10-13	Technician 3	23100002	3704235	1242948	1411902	358971	19439600	1507006	625398	184725	NQ	NQ	NQ	NQ	2655235	393752	184899	90754	52111	18318	3232701	365459	124110		0.725062	29.9685	-0.139625	0.0364755	6.29636	0.267299					35592124	0.104075	0.034922	0.0396689	0.0100857	0.546177	0.042341	0.0175712	0.00519005	0.0746018	0.0110629	0.00519494	0.00254983	0.00146412
452	2023-11-06	Technician 3	23110001	3562440	1174503	1300355	340251	18228382	1406549	603828	165469	NQ	NQ	NQ	NQ	2582521	337679	173384	87319	51390	12716	3059838	348133	114861		0.721791	29.7847	-0.141589	0.0343993	6.0331	0.270214					33549618	0.106184	0.0350079	0.0387592	0.0101417	0.543326	0.0419244	0.0179981	0.00493207	0.0769762	0.0100651	0.00516799	0.00260268	0.00153176
453	2023-11-07	Technician 3	23110011	4159545	1376733	1540329	411381	21168952	1676470	726105	211335	NQ	NQ	NQ	NQ	3071438	365588	209216	102318	60568	17167	3660650	417064	137350		0.724924	29.9607	-0.139708	0.0374477	6.08754	0.275137					39312209	0.105808	0.0350205	0.0391819	0.0104645	0.538483	0.042645	0.0184702	0.00537581	0.0781294	0.0092996	0.00532191	0.0026027	0.00154069
454	2023-11-10	Technician 3	23110046	3369898	1101600	1259685	332080	17508606	1352608	629833	179846	NQ	NQ	NQ	NQ	2614344	307374	178099	79229	49683	15739	3047762	347610	116083		0.727729	30.1184	-0.13803	0.0386976	5.89354	0.279118					32490079	0.103721	0.0339057	0.0387714	0.010221	0.538891	0.0416314	0.0193854	0.00553541	0.0804659	0.00946055	0.00548164	0.00243856	0.00152917
478	2023-11-23	Technician 3	23110106	1339477	431428	480415	126907	6316049	503440	239788	71897	NQ	NQ	NQ	NQ	1014304	126149	74672	28368	17650	5365	1160663	132310	43383	5170879	0.72025	29.698	-0.142517	0.02911	5.71435	0.292625	1.22147	0.0463728			12112265	0.110588	0.0356191	0.0396635	0.0104776	0.521459	0.0415645	0.0197971	0.00593588	0.0837419	0.010415	0.00616499	0.00234209	0.0014572
503	2023-11-30	Technician 3	23110125	7320284	2343527	2742677	662687	37882072	2897205	1360698	395076	NQ	NQ	NQ	NQ	5762886	725638	357422	186752	110546	29688	6695666	758444	248238		0.72895	30.187	-0.137302	0.0399335	5.83878	0.282836			75-150		70479506	0.103864	0.0332512	0.0389145	0.00940255	0.537491	0.0411071	0.0193063	0.00560554	0.0817668	0.0102957	0.00507129	0.00264973	0.00156848
504	2023-12-04	Technician 3	23110159	4184724	1366547	1534595	410515	22317794	1684102	796915	235454	NQ	NQ	NQ	NQ	3313085	461131	219330	106229	64165	14955	3946590	427840	137678	9967522	0.726459	30.047	-0.138789	0.039767	5.99239	0.281716	2.23905	0.0799512			41221649	0.101518	0.0331512	0.0372279	0.00995872	0.54141	0.0408548	0.0193324	0.0057119	0.0803725	0.0111866	0.00532075	0.00257702	0.00155658
505	2023-12-04	Technician 3	23110184	3878754	1233281	1417894	371369	20241924	1480431	724513	211193	NQ	NQ	NQ	NQ	3144325	426610	206856	103333	59060	17605	3714991	417641	136633	9612063	0.726119	30.0279	-0.138992	0.0341345	5.98212	0.288848	2.10589	0.0753754			37786413	0.102649	0.0326382	0.0375239	0.00982811	0.535693	0.0391789	0.0191739	0.00558913	0.0832131	0.01129	0.00547435	0.00273466	0.001563
508	2023-12-04	Technician 3	23120003	3784840	1299455	1432166	370651	20879340	1580835	747979	234085	NQ	NQ	NQ	NQ	3229339	412797	220379	99902	62960	18004	3769519	423452	143409	9663615	0.722523	29.8258	-0.141148	0.0377058	5.88824	0.286739	2.16061	0.0774016			38709112	0.0977765	0.0335697	0.0369982	0.00957529	0.539391	0.0408388	0.0193231	0.00604728	0.0834258	0.0106641	0.00569321	0.00258084	0.00162649
512	2023-12-06	Technician 3	23120008	4444250	1416590	1609300	414378	22872900	1743100	822252	232536	NQ	NQ	NQ	NQ	3632585	492726	238786	107997	64628	21782	4201280	474239	160017	10559400	0.726705	30.0608	-0.138642	0.0393777	5.805	0.290857	2.16612	0.0778692			42949346	0.103477	0.0329828	0.0374697	0.00964806	0.532555	0.040585	0.0191447	0.00541419	0.0845784	0.0114723	0.00555971	0.00251452	0.00150475
514	2023-12-08	Technician 3	23120022	5006548	1654618	1875872	504957	26015082	1993393	950302	270513	NQ	NQ	NQ	NQ	4030896	458808	272123	116241	74811	20053	4739671	532319	172287	11911714	0.72555	29.9959	-0.139333	0.0350092	5.92224	0.286579	2.18399	0.0797788			48688494	0.102828	0.0339838	0.038528	0.0103712	0.534317	0.0409418	0.019518	0.00555599	0.0827895	0.00942334	0.00558906	0.00238744	0.00153652
515	2023-12-08	Technician 3	23120027	4936860	1627154	1812339	474695	26109350	2072683	963156	272007	NQ	NQ	NQ	NQ	4008880	495541	255021	131536	73129	23659	4646759	526772	170912	11928614	0.728213	30.1456	-0.137742	0.0468166	5.81519	0.284591	2.1888	0.0807433			48600453	0.101581	0.0334802	0.0372906	0.0097673	0.537224	0.0426474	0.0198178	0.0055968	0.0824865	0.0101962	0.0052473	0.00270648	0.0015047
517	2023-12-15	Technician 3	23120047	3603813	1205937	1313009	348579	19287674	1464719	675309	192605	NQ	NQ	NQ	NQ	2783875	453368	195530	86602	53315	17727	3417202	389887	122702	8841033	0.721637	29.776	-0.141681	0.0375244	6.3515	0.28058	2.18161	0.0763835			35611853	0.101197	0.0338634	0.03687	0.00978829	0.541608	0.0411301	0.018963	0.00540845	0.0781727	0.0127308	0.00549059	0.00243183	0.00149711
520	2024-01-08	Technician 3	24010002	3734227	1212350	1330986	356094	19659894	1501573	651423	186271	NQ	NQ	NQ	NQ	2950016	386036	190901	93422	55780	17289	3462761	392367	131591	9231134	0.724529	29.9385	-0.139944	0.0412946	5.94103	0.279762	2.12974	0.070568			36312981	0.102834	0.0333861	0.0366532	0.00980625	0.541401	0.0413509	0.0179391	0.0051296	0.0812386	0.0106308	0.0052571	0.00257269	0.00153609
521	2024-01-12	Technician 3	24010045	2809361	895833	1047308	254506	14253618	1085382	549939	161672	NQ	NQ	NQ	NQ	2244391	315116	155404	67718	42768	12817	2688179	310354	104905	6939567	0.727132	30.0848	-0.138387	0.0359301	6.18179	0.294826	2.05396	0.0792469			26999271	0.104053	0.0331799	0.0387902	0.0094264	0.527926	0.0402004	0.0203687	0.00598801	0.0831278	0.0116713	0.00575586	0.00250814	0.00158404
522	2024-01-15	Technician 3	24010081	2712436	897084	975689	253226	13914995	1087592	522663	160653	NQ	NQ	NQ	NQ	2226700	277421	159088	66575	41318	11879	2626463	293381	99810	6741387	0.720847	29.7316	-0.142157	0.0372706	5.97679	0.29469	2.06411	0.0775305			26326973	0.103029	0.0340747	0.0370604	0.0096185	0.528545	0.0413109	0.0198528	0.00610222	0.0845787	0.0105375	0.00604278	0.00252878	0.00156942
555	2024-02-23	Technician 3	24020249	4972528	1692977	1986492	535275	27061340	2199618	962978	296765	NQ	NQ	NQ	NQ	3930516	577312	270687	136573	79045	22070	4749570	536190	181813	10566945	0.736065	30.5868	-0.133084	0.0492982	6.22876	0.279871	2.56094	0.0911312			50191749	0.0990706	0.0337302	0.0395781	0.0106646	0.539159	0.0438243	0.019186	0.00591263	0.07831	0.0115021	0.00539306	0.00272102	0.00157486
161	2019-05-03	Other	19050003	387764	130160	147075	44675	1920908	168446	75035	24639	NQ	NQ	NQ	NQ	305767	39470	20786	10034	6580	1976	361550	39198	13168		0.73456	30.5023	-0.133973	0.0488044	5.95176	0.295692					3697231	0.10488	0.0352047	0.0397798	0.0120834	0.519553	0.04556	0.0202949	0.00666418	0.0827016	0.0106756	0.00562205	0.00271392	0.00177971
374	2022-09-21	Other	22090061	3106626	994630	1145371	326486	16307000	1320341	554526	154531	NQ	NQ	NQ	NQ	2395260	402078	153938	72086	47381	13824	2945790	341457	115435		0.737345	30.6588	-0.132329	0.0538674	6.43119	0.283498					30396760	0.102203	0.0327216	0.0376807	0.0107408	0.536472	0.0434369	0.0182429	0.0050838	0.0787998	0.0132277	0.00506429	0.0023715	0.00155875
[truncated: 4 more columns]

## Sheet: Blad1
GDGT	stdev
f1302	0.00422125
f1300	0.00113661
f1298	0.00142783
f1296	0.000646866
f1292	0.00728943
f1292_prime	0.00186171
f1050	0.000825387
f1050_prime	0.000425436
f1036	0.00289596
f1036_prime	0.00147786
f1034	0.000373104
f1034_prime	0.000250707
f1032	9.17744e-05
f1032_prime	0.000121831
f1022	0.00337652
f1020	0.000551831
f1018	0.000212184
