# Supplementary material for: Reviews and syntheses: Best practices for the application of marine GDGTs as proxy for paleotemperatures: sampling, processing, analyses, interpretation, and archiving protocols
Source: Copernicus journal article supplement (doi:10.5194/bg-22-6465-2025), 2025-11-06
Supplement: Supplementary file 5 [file Table S3.xlsx]

## Sheet: Read Me
For core-top samples
Note: Please refer to Table 4 in the GDGT cookbook Section 10 “Data reporting and archiving” for full details
Item no.	Column Names	Common notations	Units	Level of importance	Descriptions	Remarks
1	sample_ID			required
2	cruise_RV_info			required	Cruise name/ID of the program/expedition that collect marine sediments at sea
3	core_name			required
4	latitude		decimal degree	required
5	longitude		decimal degree	required
6	modern_water_depth		meters below sea level	required
7	data_type			optional
8	core_type			preferred	Coring methods: Gravity Cores (GC), Kasten Cores (KC), Trigger-weight cores (TW/TC), Piston Cores (PC), Box Cores (BC), Multi-Cores (MC), Vibracores (VC), Push Cores, Drill Cores, Russian Corer, Livingstone Corer	Referred to https://corerepository.ldeo.columbia.edu/content/types-samples
9	sample_depth_start			required
10	sample_depth_end			required
11	site_description			optional
12	raw_1302	GDGT-0	arbitary units (a.u.), peak intensity	required	Raw peak abundance for isoGDGT-0	For Methane Index (MI), Ring Index (RI) calculations
13	raw_1300	GDGT-1	arbitary units (a.u.), peak intensity	required	Raw peak abundance for isoGDGT-1	For TEX86, Methane Index (MI), Ring Index (RI) calculations
14	raw_1298	GDGT-2	arbitary units (a.u.), peak intensity	required	Raw peak abundance for isoGDGT-2	For TEX86, Methane Index (MI), Ring Index (RI) calculations
15	raw_1296	GDGT-3	arbitary units (a.u.), peak intensity	required	Raw peak abundance for isoGDGT-3	For TEX86, Methane Index (MI), Ring Index (RI) calculations
16	raw_1294	GDGT-4	arbitary units (a.u.), peak intensity	required when identified	Raw peak abundance for isoGDGT-4. Required, but usually unidentified in modern marine settings	For TEX86, Methane Index (MI), Ring Index (RI) calculations
17	raw_1292	Cren	arbitary units (a.u.), peak intensity	required	Raw peak abundance for isoGDGT-5 or Crenarchaeol (cren)	For Methane Index (MI), Ring Index (RI), Branched vs Isoprenoid index (BIT) calculations
18	raw_1292_prime	Cren’	arbitary units (a.u.), peak intensity	required	Raw peak abundance for isoGDGT-5 isomer or Cren isomer (cren’)	For TEX86, Methane Index (MI), Ring Index (RI) calculations
19	raw_1050	brGDGT-IIIa	arbitary units (a.u.), peak intensity	required	Raw peak abundance for brGDGT-IIIa (non-cyclized branched GDGTs)	For Branched vs Isoprenoid index (BIT) calculation
20	raw_1036	brGDGT-IIa	arbitary units (a.u.), peak intensity	required	Raw peak abundance for brGDGT-Iia (non-cyclized branched GDGTs)	For Branched vs Isoprenoid index (BIT) calculation
21	raw_1022	BrGDGT-Ia	arbitary units (a.u.), peak intensity	required	Raw peak abundance for brGDGT-Ia (non-cyclized branched GDGTs)	For Branched vs Isoprenoid index (BIT) calculation
22	frac_1302	GDGT-0	relative abundance of isoGDGTs	optional
23	frac_1300	GDGT-1	relative abundance of isoGDGTs	optional
24	frac_1298	GDGT-2	relative abundance of isoGDGTs	optional
25	frac_1296	GDGT-3	relative abundance of isoGDGTs	optional
26	frac_1294	GDGT-4	relative abundance of isoGDGTs	optional
27	frac_1292	Cren	relative abundance of isoGDGTs	optional
28	frac_1292_prime	Cren’	relative abundance of isoGDGTs	optional
29	TEX86			optional	Author(s) may choose to report the resulting TEX86 values. However, we do not recommend reporting only TEX86 values as raw peak intensities and/or relative fractional abundances of individual GDGTs are essential for quality-control
30	BIT			optional*	*required when reporting fractional abundance of isoGDGTs
31	sample_weight			required*	*required when reporting absolute abundance of isoGDGTs
32	amount_spiked_standard			required*	*required when reporting absolute abundance of isoGDGTs
33	firstAuthor_lastName			required	Short form of data source reference
34	publicationYear			required	Long form of data source reference
35	DOI			required	DOI link to data source. If published in “this study,” the link can be the repository where data is deposited.

## Sheet: coretop_isoGDGT_reporting_templ
sample_ID	cruise_RV_info	core_name	latitude	longitude	modern_water_depth	data_type	core_type	sample_depth_start	sample_depth_end	site_description (optional)	raw_1302	raw_1300	raw_1298	raw_1296	Raw_1294 (optional)	raw_1292	raw_1292_prime	raw_1050	raw_1036	raw_1022	frac_1302	frac_1300	frac_1298	frac_1296	frac_1292	frac_1292_prime	TEX86	BIT	firstAuthor_lastName	publicationYear	DOI
RR0001	R/V Oceanus	OCE437-7 MC1A	37.8278	-9.5128	1123	coretop	MC (multi-corer)	1	2	Portugal offshore											0.282564	0.0682246	0.0747257	0.0105283	0.527243	0.0367146	0.641293	0.04355	Tierney	2015	https://doi.org/10.1038/sdata.2015.29
RR0002	R/V Oceanus	OCE437-7 MC4E	37.8372	-10.184	3146	coretop	MC (multi-corer)	1	2	Portugal offshore											0.277802	0.0654216	0.0759598	0.00908557	0.531056	0.0406751	0.657767	0.049	Tierney	2015	https://doi.org/10.1038/sdata.2015.29
RR0003	R/V Oceanus	OCE437-7 MC7B	36.7722	-9.8672	2735	coretop	MC (multi-corer)	1	2	Portugal offshore											0.287833	0.0630186	0.0748791	0.00978984	0.526044	0.0384357	0.661402	0.0612	Tierney	2015	https://doi.org/10.1038/sdata.2015.29
