# Supplementary material for: Reviews and syntheses: Best practices for the application of marine GDGTs as proxy for paleotemperatures: sampling, processing, analyses, interpretation, and archiving protocols
Source: Copernicus journal article supplement (doi:10.5194/bg-22-6465-2025), 2025-11-06
Supplement: Supplementary file 7 [file Table S4.xlsx]

## Sheet: Read Me
For downcore samples
Note: Please refer to Table 4 in the GDGT cookbook Section 10 “Data reporting and archiving” for full details
Item no.	Column Names	Common notations	Units	Level of importance	Descriptions	Remarks
1	sample_ID			required
2	cruise_RV_info			required	Cruise name/ID of the program/expedition that collect marine sediments at sea
3	sample_request_ID			optional	IODP sample request ID is useful for tracking back to IODP sampling data base
4	sample_name			required	Core name that identify the exact Site, Hole, Core (and type), Section (and half), and sampling intervals (by convention in cm below the section top). For IODP samples, author(s) may join all sampling information with “_”. For example, core_name “94_608A_21X_5W_52-55” represents DSDP sample from Leg 94, Site 608, Core 21X, Section 5, working half, Interval 52-55 (cm).
5	latitude		decimal degree	required
6	longitude		decimal degree	required
7	modern_water_depth		meters below sea level	required
8	sample_depth		meters below sea floor	required
9	sample_depth_type			required	IODP sample have different depth information. Please refer to “IODP depth scale terminology” and report the type of reporting depth accordingly. For example, CSF-A and CSF-B are core depth below seafloor; referred to as “MBSF.” CCSF is a core composite depth below sea floor; referred to as “MCD.”
10	Age		million years ago (Ma), thousand years ago (Ka)	required	Numerical age based on an age-depth model. Must-add is a reference of the age model that was used
11	Reference_GTS			preferred	The version of Geologic Time Scale that the age-depth model were tuned to. This information must be reported in text for new GDGT measurements with reporting Age based on a new established age-depth model.
12	data_type			optional
13	site_description (optional)			optional
14	raw_1302	GDGT-0	arbitary units (a.u.), peak intensity	required	Raw peak abundance for isoGDGT-0	For Methane Index (MI), Ring Index (RI) calculations
15	raw_1300	GDGT-1	arbitary units (a.u.), peak intensity	required	Raw peak abundance for isoGDGT-1	For TEX86, Methane Index (MI), Ring Index (RI) calculations
16	raw_1298	GDGT-2	arbitary units (a.u.), peak intensity	required	Raw peak abundance for isoGDGT-2	For TEX86, Methane Index (MI), Ring Index (RI) calculations
17	raw_1296	GDGT-3	arbitary units (a.u.), peak intensity	required	Raw peak abundance for isoGDGT-3	For TEX86, Methane Index (MI), Ring Index (RI) calculations
18	raw_1294 (optional)	GDGT-4	arbitary units (a.u.), peak intensity	required when identified	Raw peak abundance for isoGDGT-4. Required, but usually unidentified in modern marine settings	For TEX86, Methane Index (MI), Ring Index (RI) calculations
19	raw_1292	Cren	arbitary units (a.u.), peak intensity	required	Raw peak abundance for isoGDGT-5 or Crenarchaeol (cren)	For Methane Index (MI), Ring Index (RI), Branched vs Isoprenoid index (BIT) calculations
20	raw_1292_prime	Cren’	arbitary units (a.u.), peak intensity	required	Raw peak abundance for isoGDGT-5 isomer or Cren isomer (cren’)	For TEX86, Methane Index (MI), Ring Index (RI) calculations
21	raw_1050	brGDGT-IIIa	arbitary units (a.u.), peak intensity	required	Raw peak abundance for brGDGT-IIIa (non-cyclized branched GDGTs)	For Branched vs Isoprenoid index (BIT) calculation
22	raw_1036	brGDGT-IIa	arbitary units (a.u.), peak intensity	required	Raw peak abundance for brGDGT-Iia (non-cyclized branched GDGTs)	For Branched vs Isoprenoid index (BIT) calculation
23	raw_1022	BrGDGT-Ia	arbitary units (a.u.), peak intensity	required	Raw peak abundance for brGDGT-Ia (non-cyclized branched GDGTs)	For Branched vs Isoprenoid index (BIT) calculation
24	frac_1302	GDGT-0	relative abundance of isoGDGTs	optional
25	frac_1300	GDGT-1	relative abundance of isoGDGTs	optional
26	frac_1298	GDGT-2	relative abundance of isoGDGTs	optional
27	frac_1296	GDGT-3	relative abundance of isoGDGTs	optional
28	frac_1292	GDGT-4	relative abundance of isoGDGTs	optional
29	frac_1292_prime	Cren	relative abundance of isoGDGTs	optional
30	TEX86			optional	Author(s) may choose to report the resulting TEX86 values. However, we do not recommend reporting only TEX86 values as raw peak intensities and/or relative fractional abundances of individual GDGTs are essential for quality-control
31	BIT			optional*	*required when reporting fractional abundance of isoGDGTs
32	sample_weight	grams (dry sediment) or relevant unit description		required*	*required when reporting absolute abundance of isoGDGTs
33	amount_spiked_standard			required*	*required when reporting absolute abundance of isoGDGTs
34	firstAuthor_lastName			required	Short form of data source reference
35	publicationYear			required	Long form of data source reference
36	DOI			required	DOI link to data source. If published in “this study,” the link can be the repository where data is deposited.

## Sheet: downcore_isoGDGT_reporting_temp
sample_ID	cruise_RV_info	sample_request_ID	sample_name	latitude	longitude	modern_water_depth	sample_depth	sample_depth_type	Age	Reference_GTS	data_type	site_description (optional)	raw_1302	raw_1300	raw_1298	raw_1296	raw_1294 (optional)	raw_1292	raw_1292_prime	raw_1050	raw_1036	raw_1022	frac_1302	frac_1300	frac_1298	frac_1296	frac_1292	frac_1292_prime	TEX86	BIT	sample_weight	firstAuthor_lastName	publicationYear	Remark	DOI
RR0001	DSDP 463			21.3502	174.668	2525		mbsf			downcore	Tropical Pacific Ocean	49700	5420	6570	1340		25100	11900				0.496851	0.0541837	0.0656803	0.013396	0.250925	0.118964	0.641293	0.04355		Schouten	2003	Data retrieved from O'Brien et al. (2017)	https://doi.org/10.1130/G19876.1
RR0002	DSDP 463			21.3502	174.668	2525		mbsf			downcore	Tropical Pacific Ocean	58900	28700	40800	16100		356000	57800				0.105499	0.0514061	0.073079	0.0288375	0.63765	0.103529	0.657767	0.049		Schouten	2003	Data retrieved from O'Brien et al. (2017)	https://doi.org/10.1130/G19876.1
RR0003	DSDP 463			21.3502	174.668	2525		mbsf			downcore	Tropical Pacific Ocean	21000	5820	4620	4760		56400	16800				0.191956	0.0531993	0.0422303	0.0435101	0.515539	0.153565	0.661402	0.0612		Schouten	2003	Data retrieved from O'Brien et al. (2017)	https://doi.org/10.1130/G19876.1
RR0004	DSDP 608		94_608A_21X_5W_52-55	42.8367	-23.0875	3526	191.835	mbsf	8.924	GTS2012	downcore	Temperate North Atlantic											0.488	0.073	0.071	0.007	0.324	0.036	0.61	0.59	35.6399	Super	2018	Data retrieved from Original Source	'https://doi.org/10.1130/G40228.1
RR0005	DSDP 608		94_608A_22X_1W_79-82	42.8367	-23.0875	3526	195.705	mbsf	9.205	GTS2012	downcore	Temperate North Atlantic											0.535	0.069	0.067	0.007	0.29	0.032	0.61	0.69	43.5612	Super	2018	Data retrieved from Original Source	'https://doi.org/10.1130/G40228.1
RR0006	DSDP 608		94_608A_22X_2W_104-107	42.8367	-23.0875	3526	197.455	mbsf	9.293	GTS2012	downcore	Temperate North Atlantic											0.468	0.079	0.07	0.009	0.337	0.037	0.59	0.55	54.8767	Super	2018	Data retrieved from Original Source	'https://doi.org/10.1130/G40228.1
