# Supplementary material for: Reviews and syntheses: Best practices for the application of marine GDGTs as proxy for paleotemperatures: sampling, processing, analyses, interpretation, and archiving protocols
Source: Copernicus journal article supplement (doi:10.5194/bg-22-6465-2025), 2025-11-06
Supplement: Supplementary file [file bg-22-6465-2025-supplement-title-page.pdf › bg-22-6465-2025-supplement-title-page.pdf]

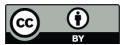

## *Supplement of*

# **Reviews and syntheses: Best practices for the application of marine GDGTs as proxy for paleotemperatures: sampling, processing, analyses, interpretation, and archiving protocols**

**Peter K. Bijl et al.**

*Correspondence to:* Peter K. Bijl ([p.k.bijl@uu.nl](mailto:p.k.bijl@uu.nl)) and Kasia K. Śliwińska ([kksl@geus.dk](mailto:kksl@geus.dk))

- [bg-22-6465-2025-supplement-title-page.pdf](#)
- Supplements
  - [Table S1.xlsx](#)
  - [Table S2.xlsx](#)
  - [Table S3.xlsx](#)
  - [Table S4.xlsx](#)

The copyright of individual parts of the supplement might differ from the article licence.
